# Supplementary material
Source: Elsevier journal article supplement (https://univ-rennes.hal.science/hal-01381138v1/file/mmc1.pdf)

## Supporting Information

### Synthesis of *N*-pyridyl azoles using a deprotometalation-iodolysis-*N*-arylation sequence and evaluation of their antiproliferative activity in melanoma cells

Madani Hedidi,<sup>a,b,†</sup> William Erb,<sup>a,\*</sup> Ghenia Bentabed-Ababsa,<sup>b,\*</sup> Floris Chevallier,<sup>a</sup>  
Laurent Picot,<sup>c</sup> Valérie Thiéry,<sup>c,\*</sup> Stéphane Bach,<sup>d,\*</sup> Sandrine Ruchaud,<sup>d</sup>  
Thierry Roisnel,<sup>e</sup> Vincent Dorcet<sup>e</sup> and Florence Mongin<sup>a</sup>

<sup>a</sup> *Chimie et Photonique Moléculaires, Institut des Sciences Chimiques de Rennes, UMR 6226, CNRS-Université de Rennes 1, Bâtiment 10A, Case 1003, Campus de Beaulieu, 35042 Rennes, France*

<sup>b</sup> *Laboratoire de Synthèse Organique Appliquée, Faculté des Sciences, Université d'Oran 1 Ahmed Ben Bella, BP 1524 El M'Naouer, 31000 Oran, Algeria*

<sup>c</sup> *Laboratoire Littoral Environnement et Sociétés, UMRi CNRS 7266, Université de La Rochelle, 17042 La Rochelle, France*

<sup>d</sup> *Sorbonne Universités, UPMC Univ Paris 06, CNRS USR3151, "Protein Phosphorylation and Human Disease" Unit, Plateforme de criblage KISSf, Station Biologique de Roscoff, Place Georges Teissier, 29688 Roscoff, France*

<sup>e</sup> *Centre de Diffractométrie X, Institut des Sciences Chimiques de Rennes, UMR 6226, Université de Rennes 1-CNRS, Bâtiment 10B, Campus de Beaulieu, 35042 Rennes, France*

william.erb@univ-rennes1.fr (W. Erb), badri\_sofi@yahoo.fr (G. Bentabed-Ababsa),  
valerie.thiery@univ-lr.fr (V. Thiéry), bach@sb-roscoff.fr (S. Bach)

**NMR data of compounds 1c, 2b', 2e', 2d', 2f', 3b', 3c', 3f', 3g', 1b, 1e, 1d, 2b, 2e, 2d, 3b, 3b'', 3e, 4b, 4e, 5b and 5e**

## 2-Methoxy-3-(1-pyrazolyl)pyridine (1c).

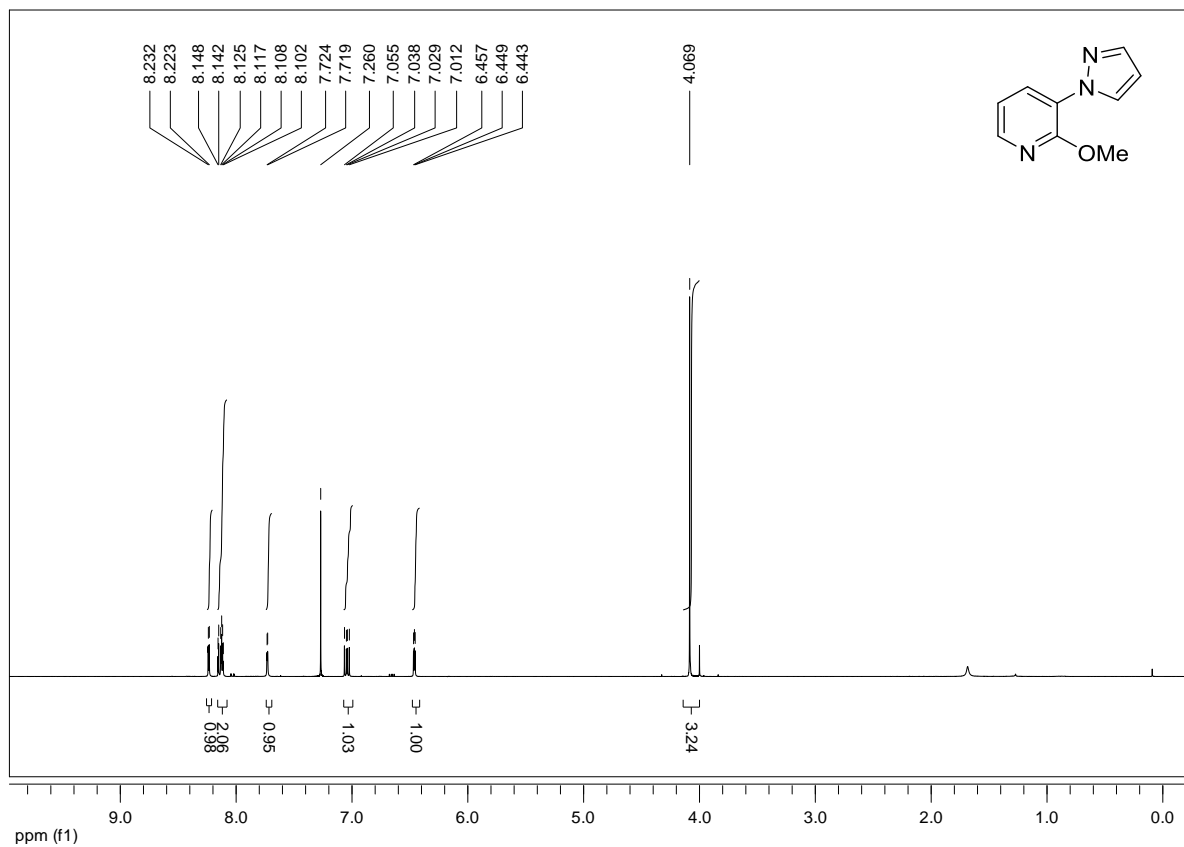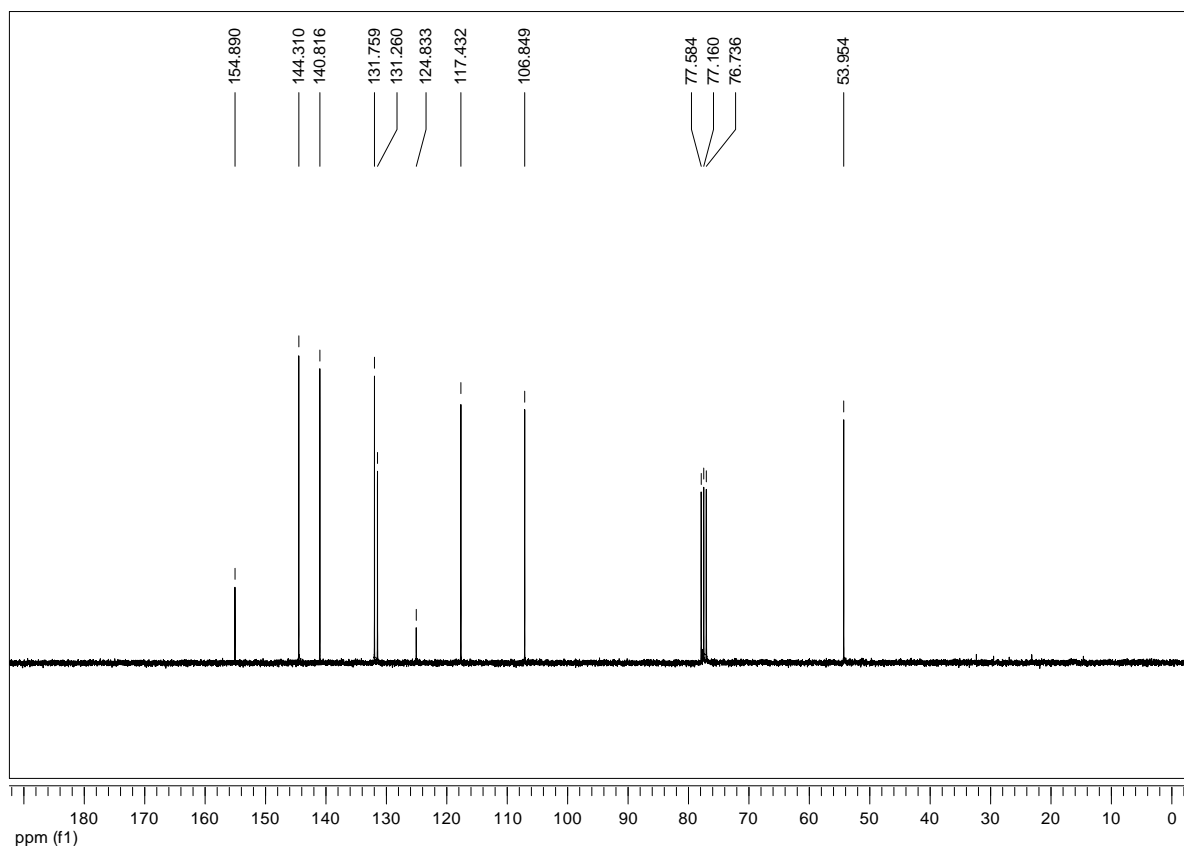

### 3-Methoxy-2-(1-pyrryl)pyridine (2b').

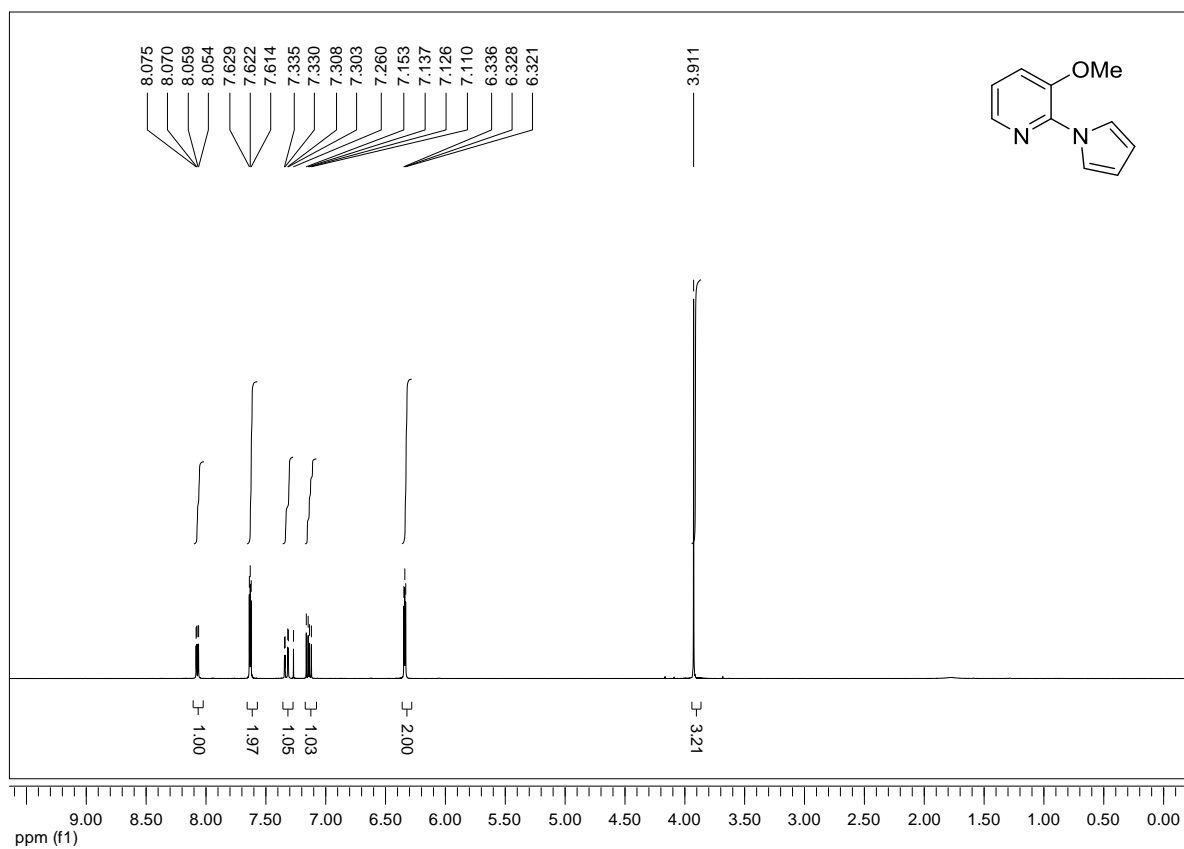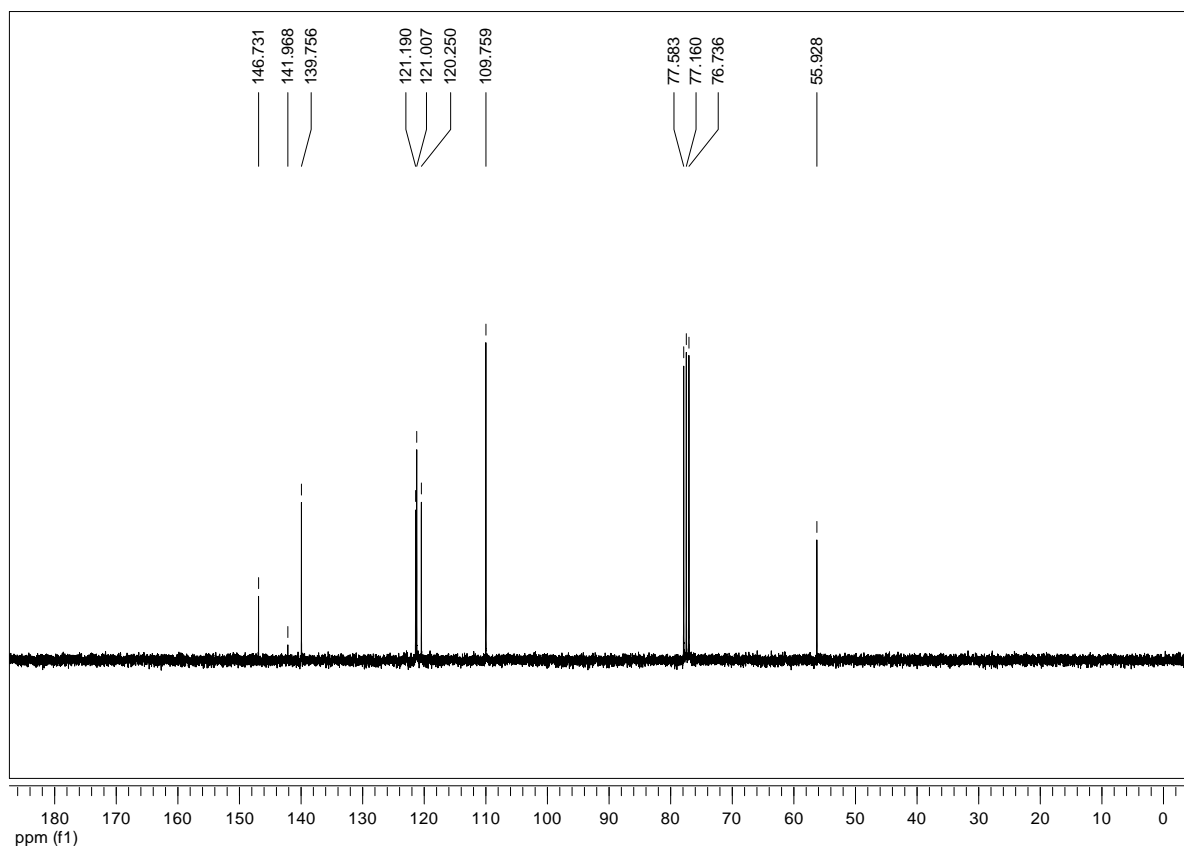

## 2-(1-Indolyl)-3-methoxypyridine (2e').

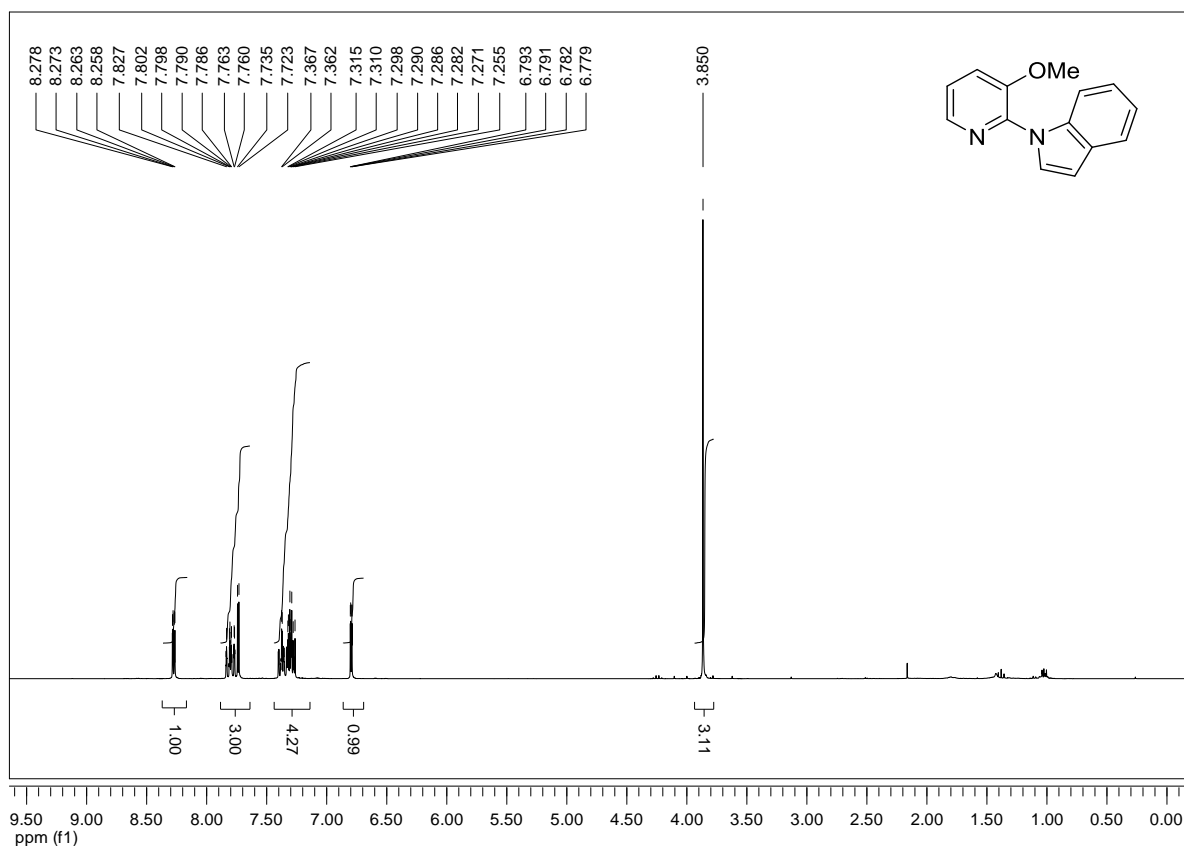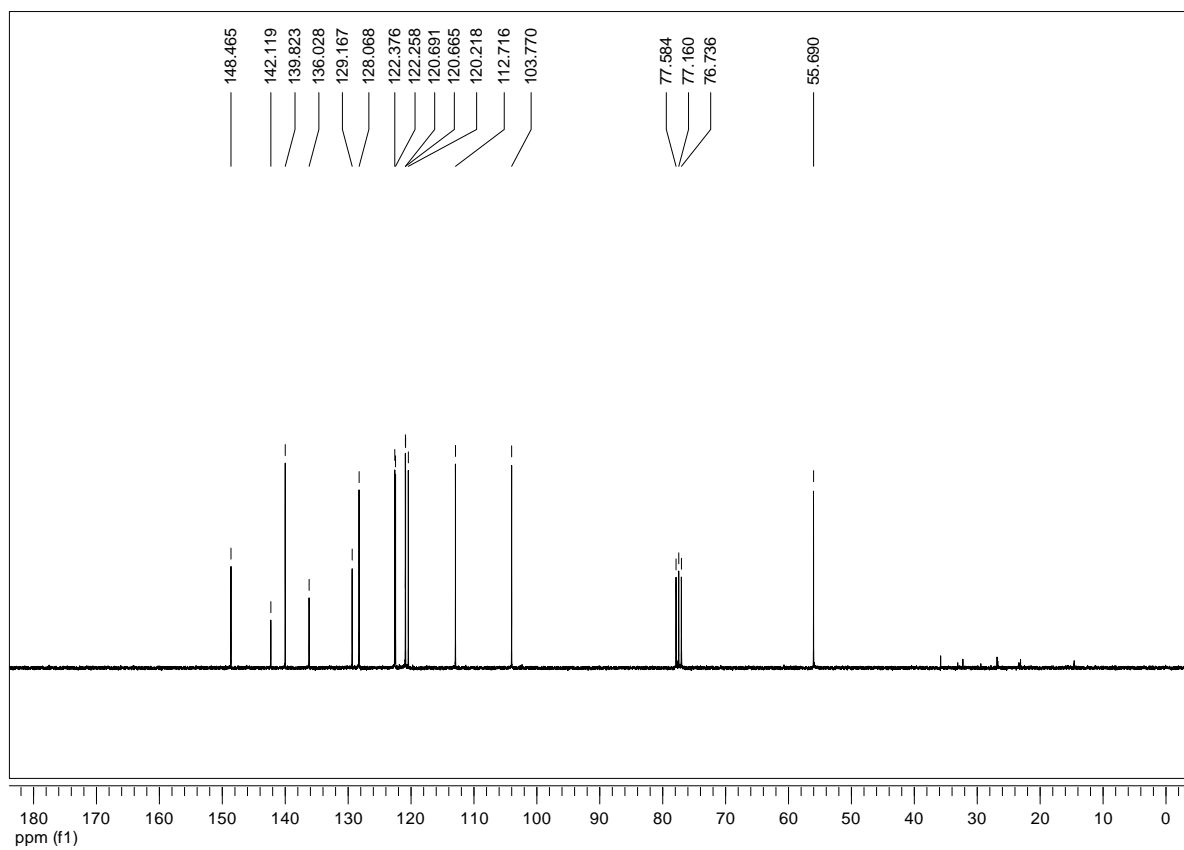

**2-(1-Benzimidazolyl)-3-methoxypyridine (2d').**

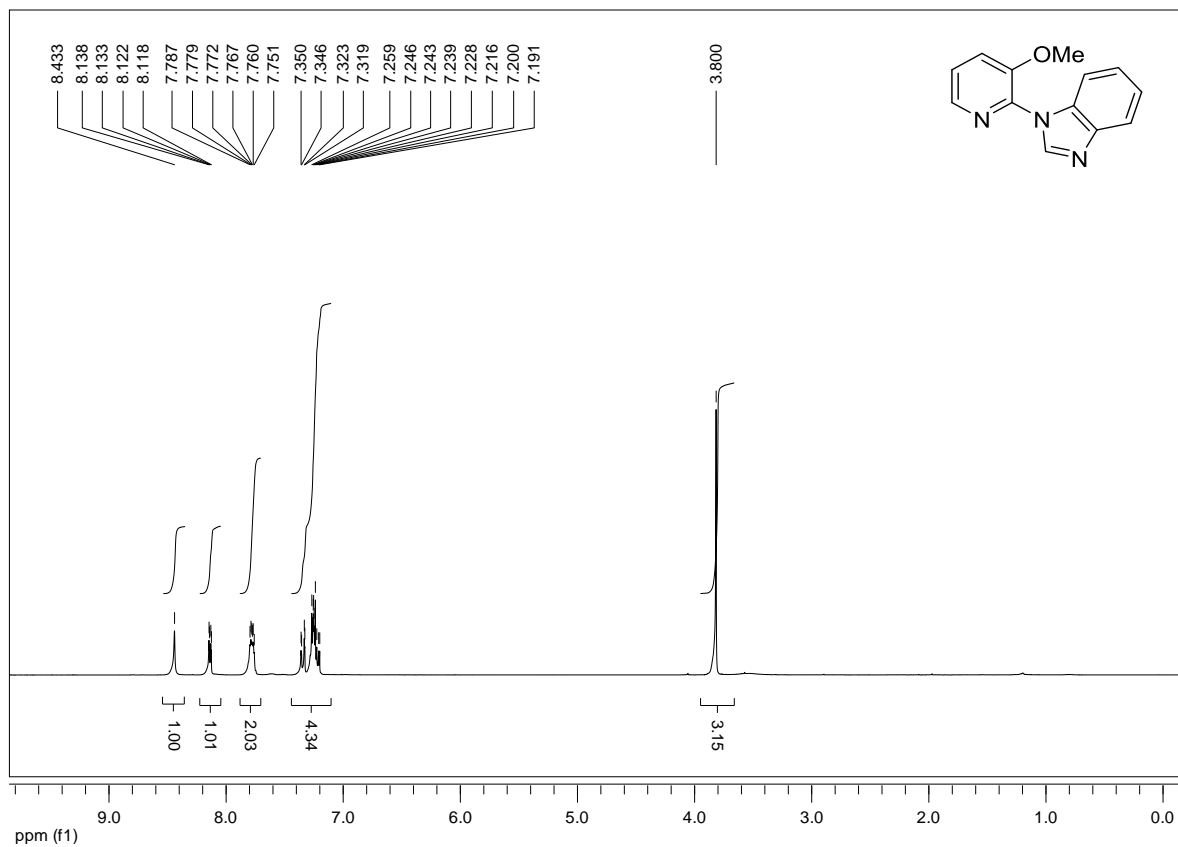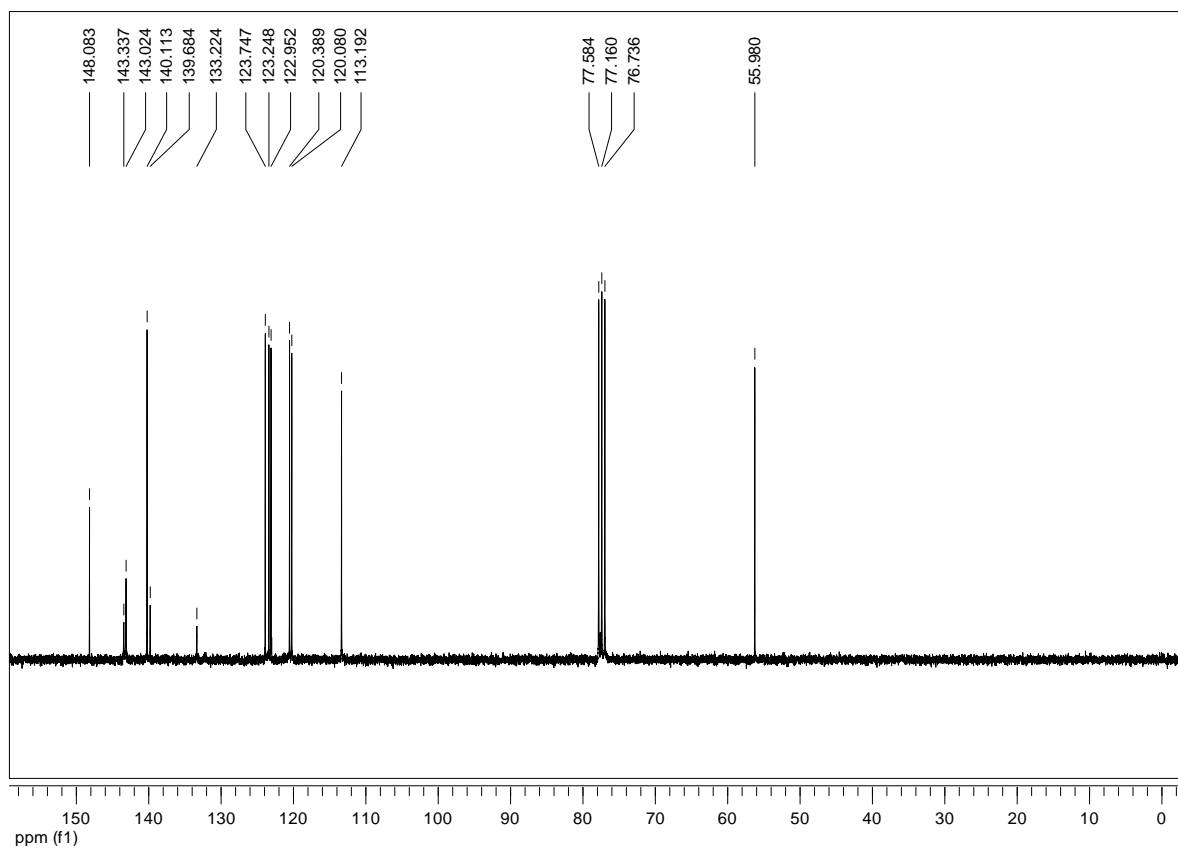

**2-(1-Indazolyl)-3-methoxypyridine (2f').**

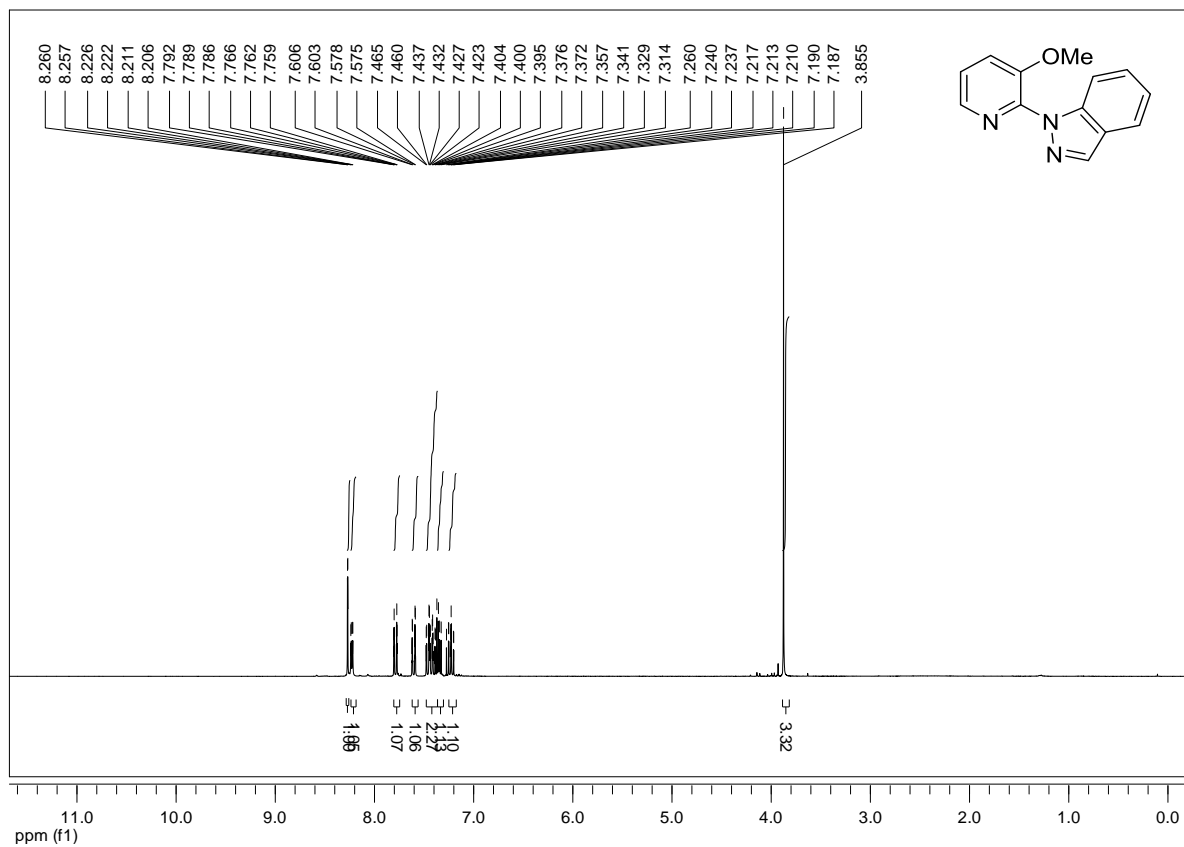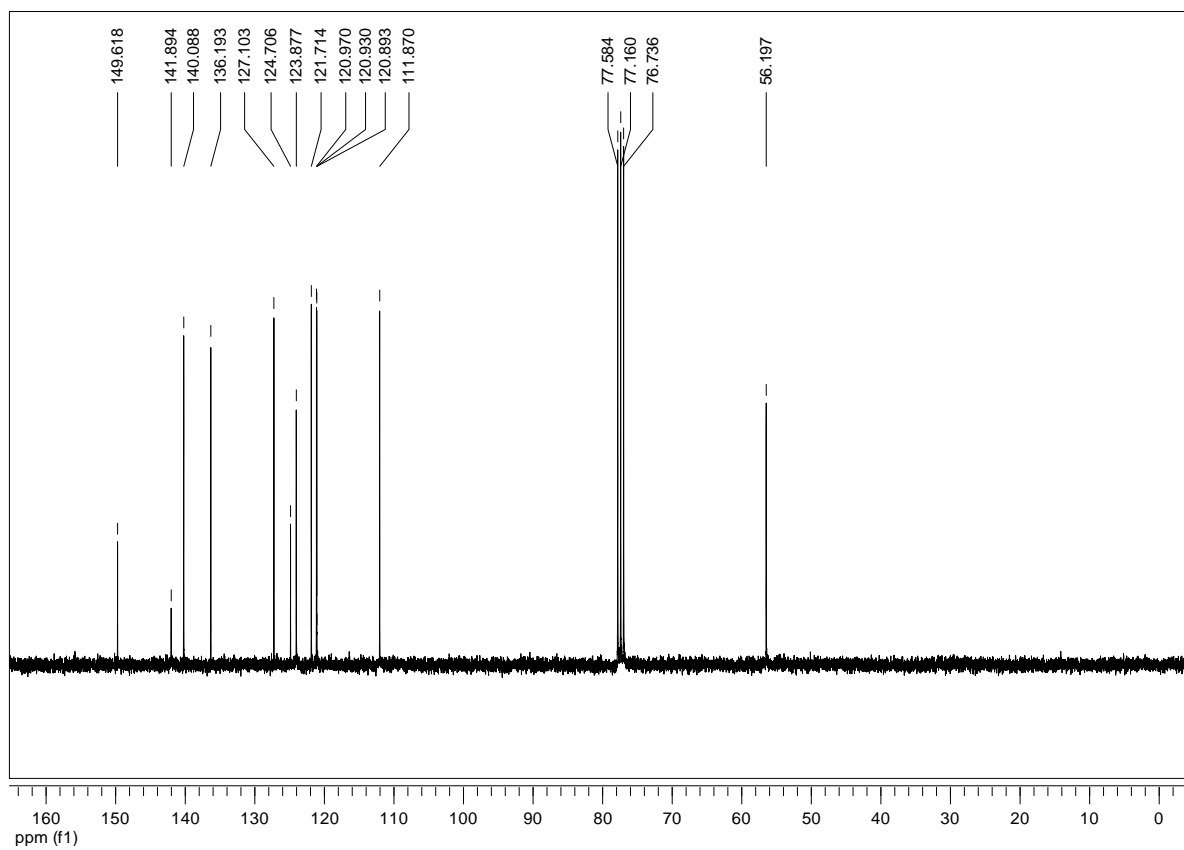

### 4-Methoxy-2-(1-pyrryl)pyridine (3b').

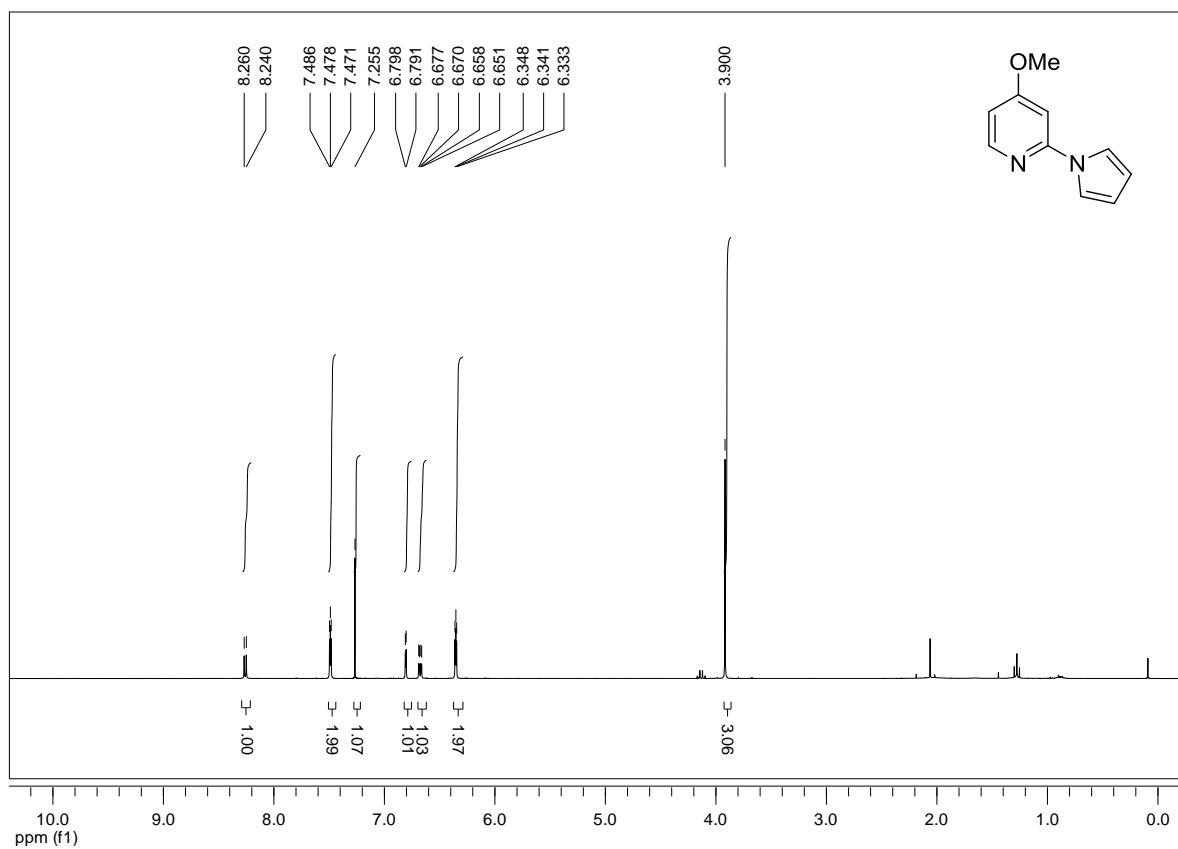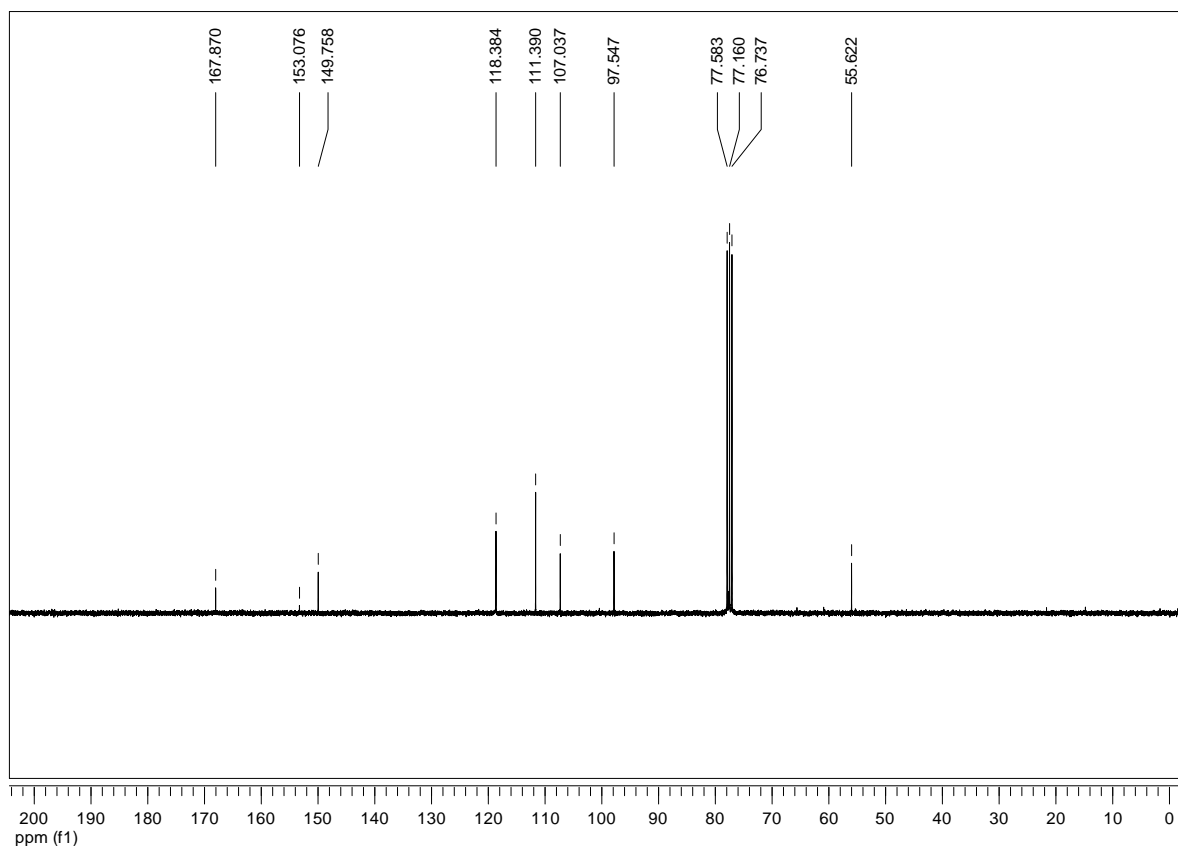

### 4-Methoxy-2-(1-pyrazolyl)pyridine (3c').

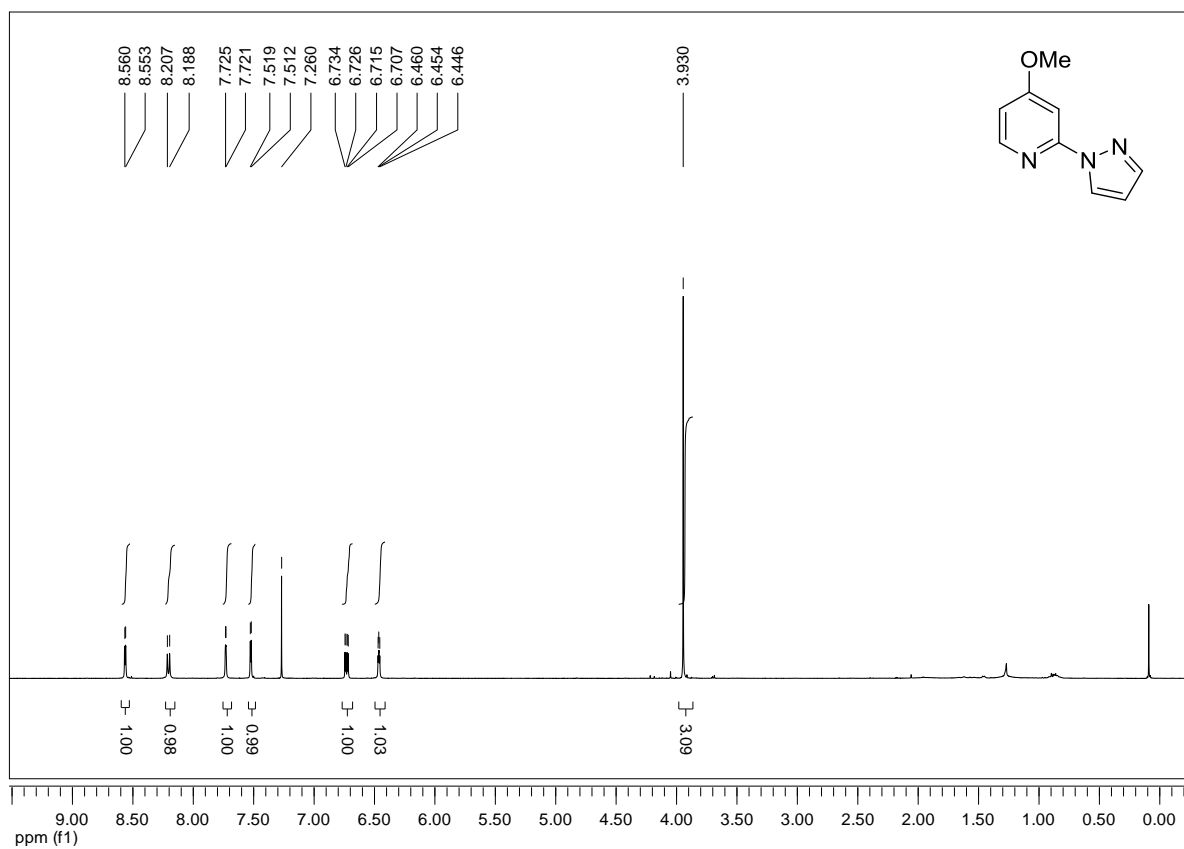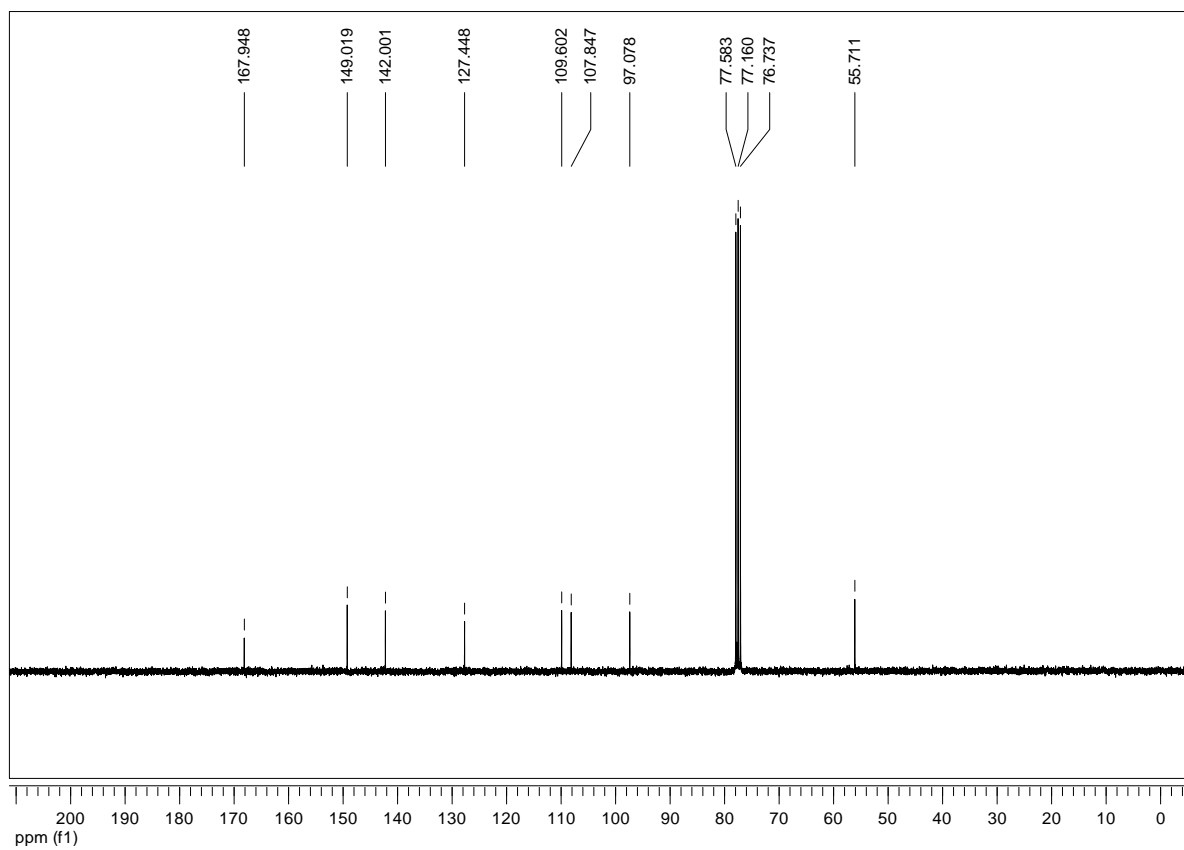



## 2-(1-Indazolyl)-4-methoxypyridine (3f').

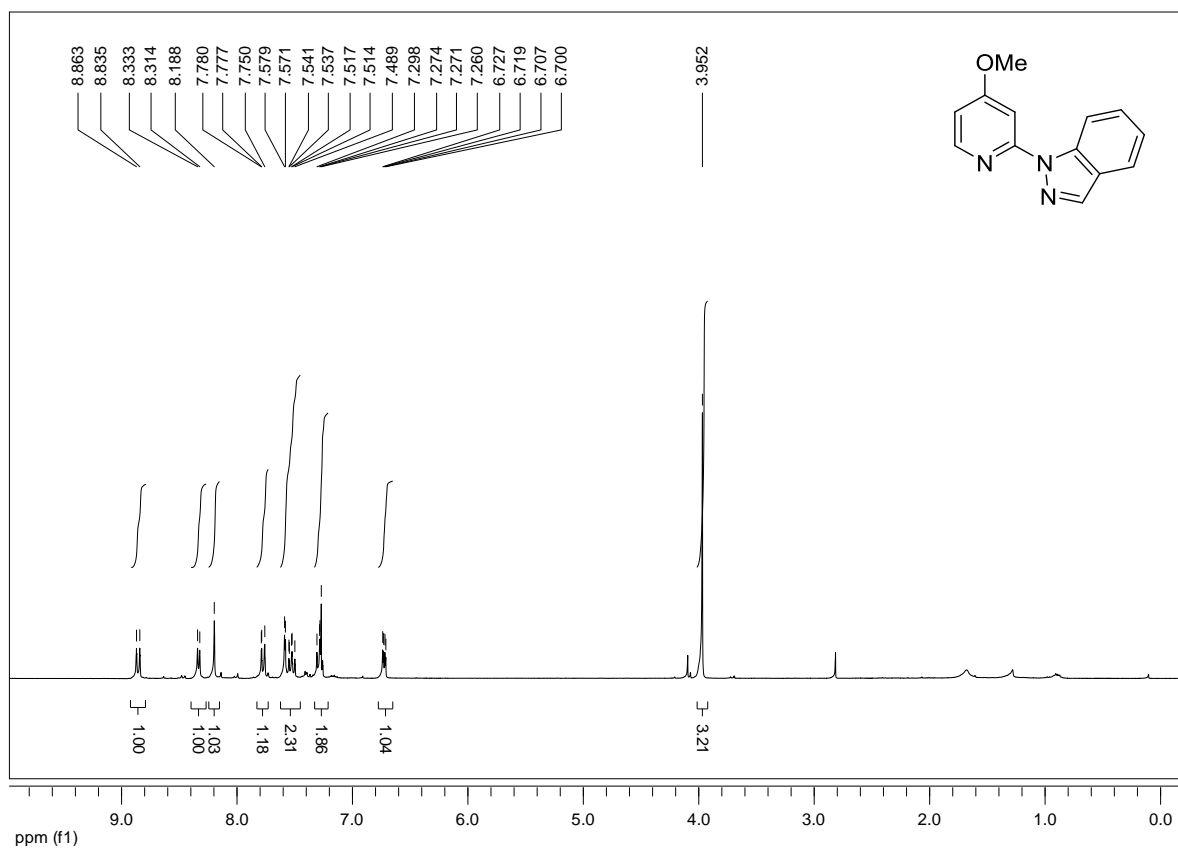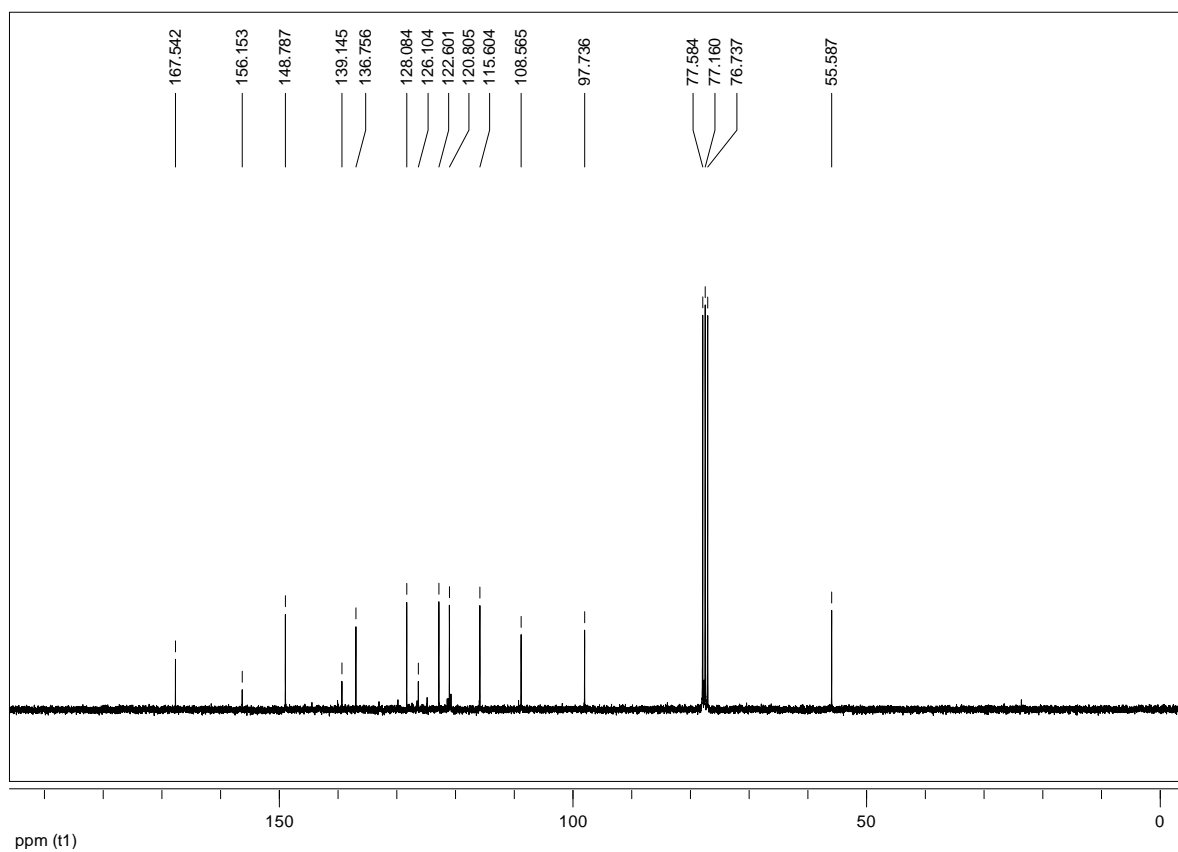

## 2-(1-Benzotriazolyl)-4-methoxypyridine (3g<sup>2</sup>).

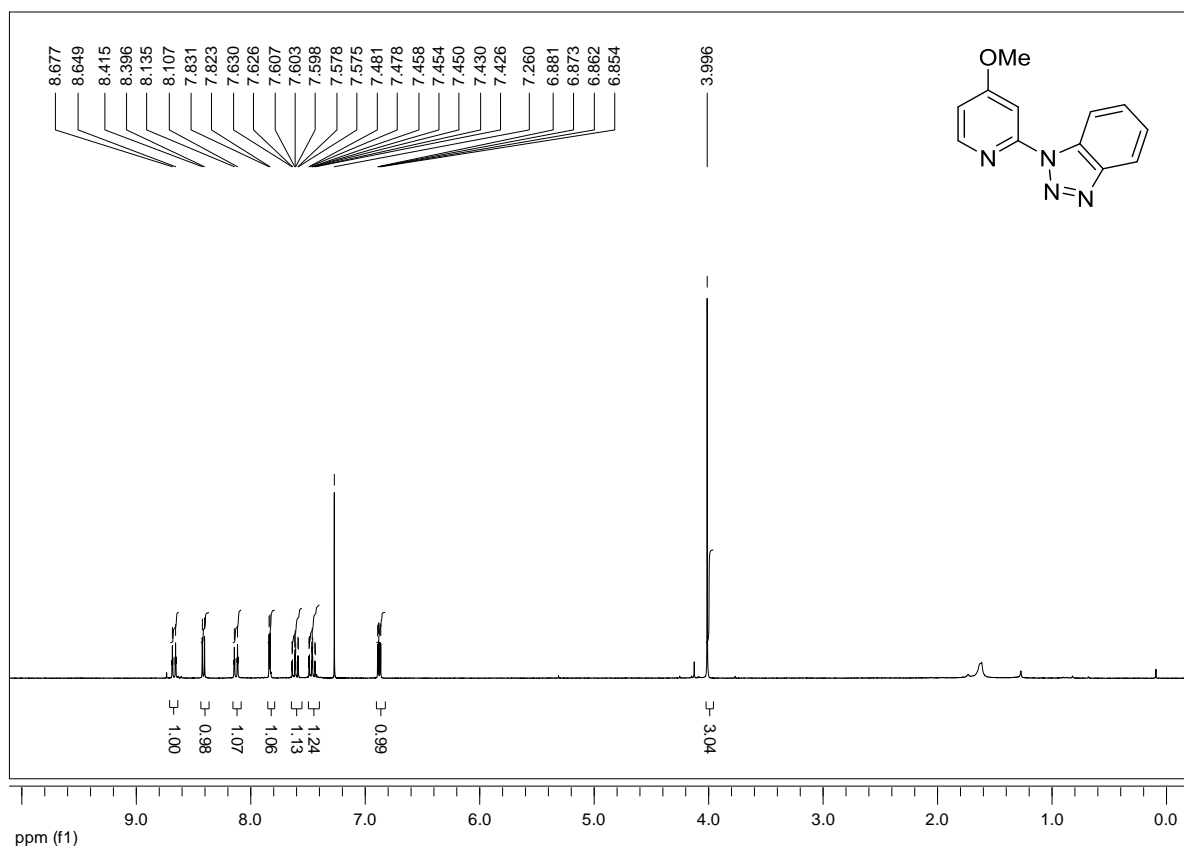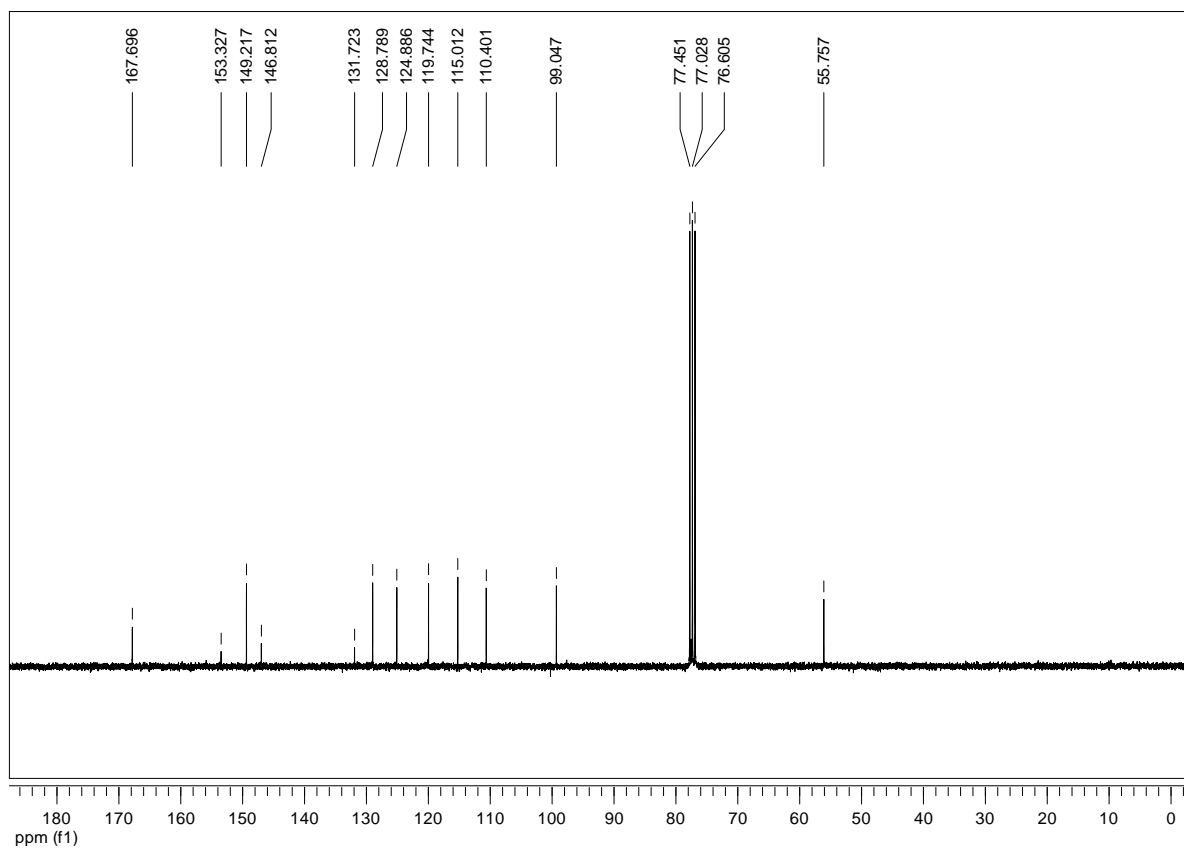

## 2-Methoxy-3-(1-pyrrolyl)pyridine (1b).

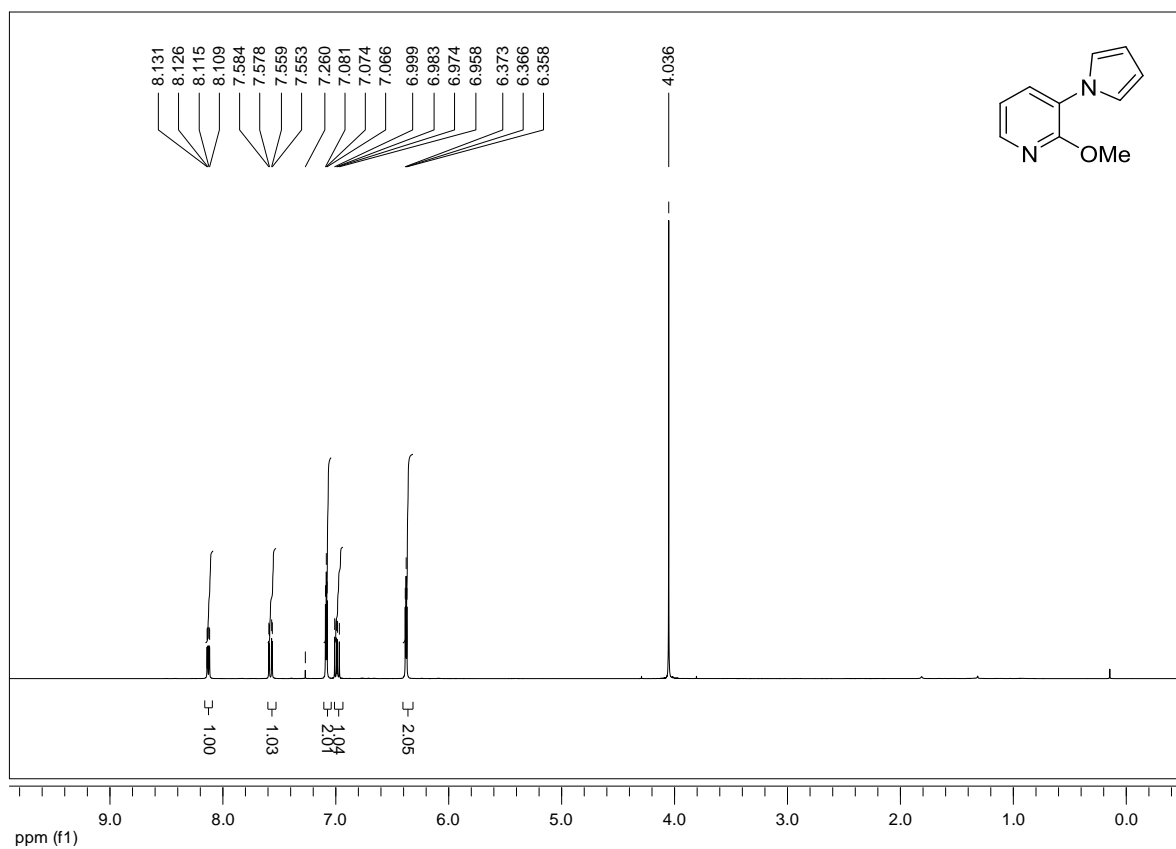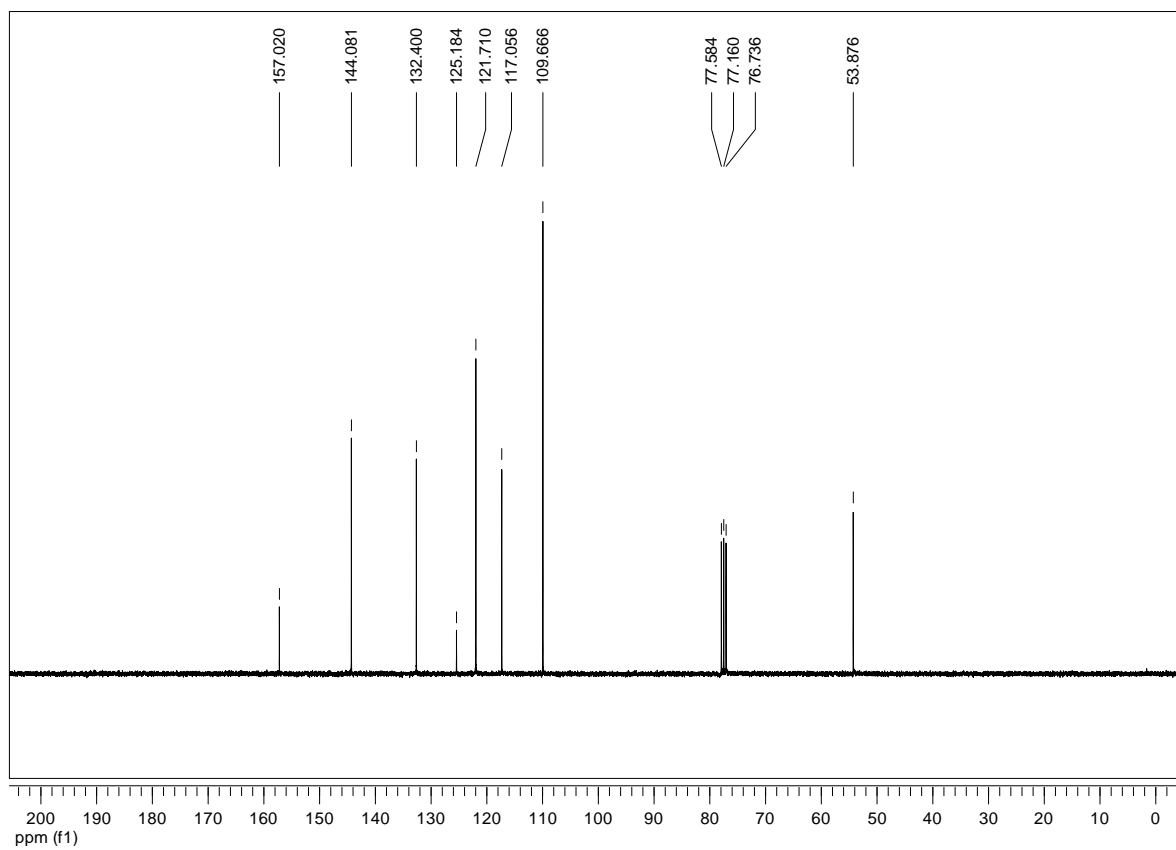

### 3-(1-Indolyl)-2-methoxypyridine (1e).

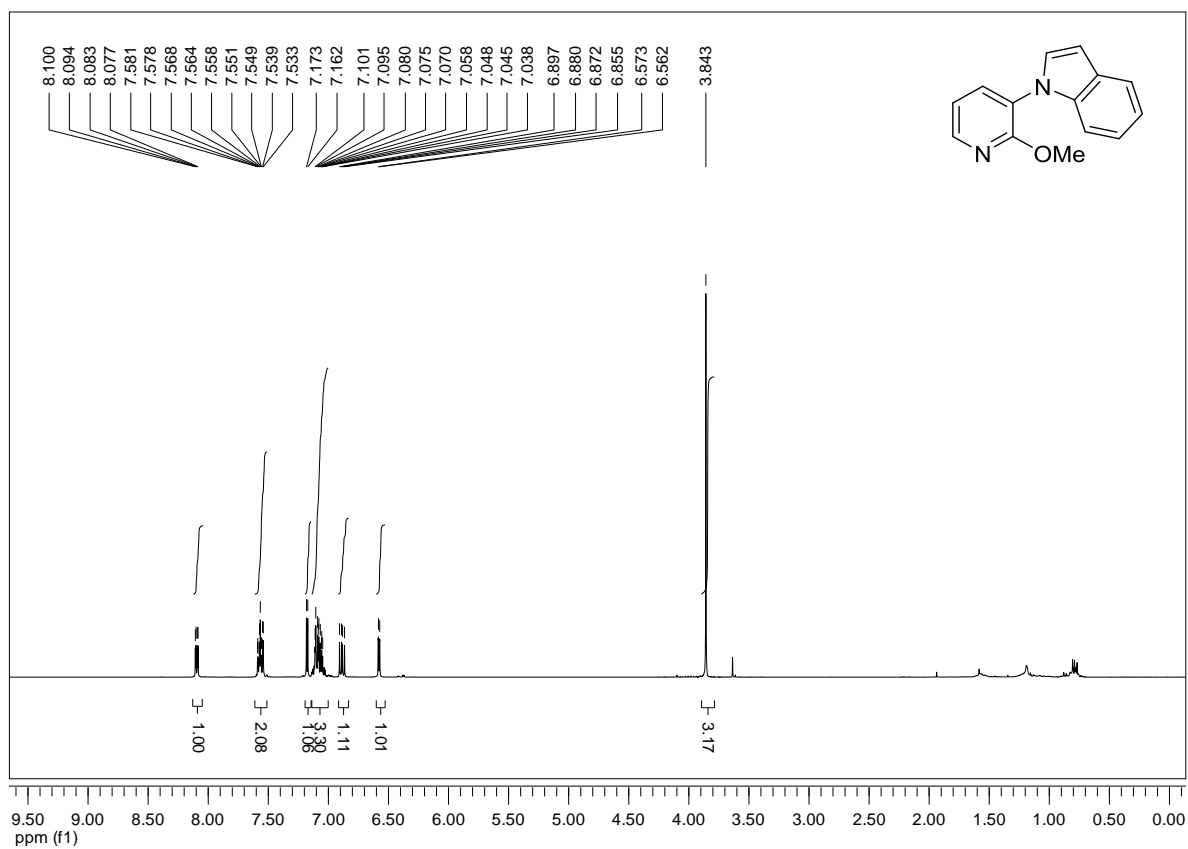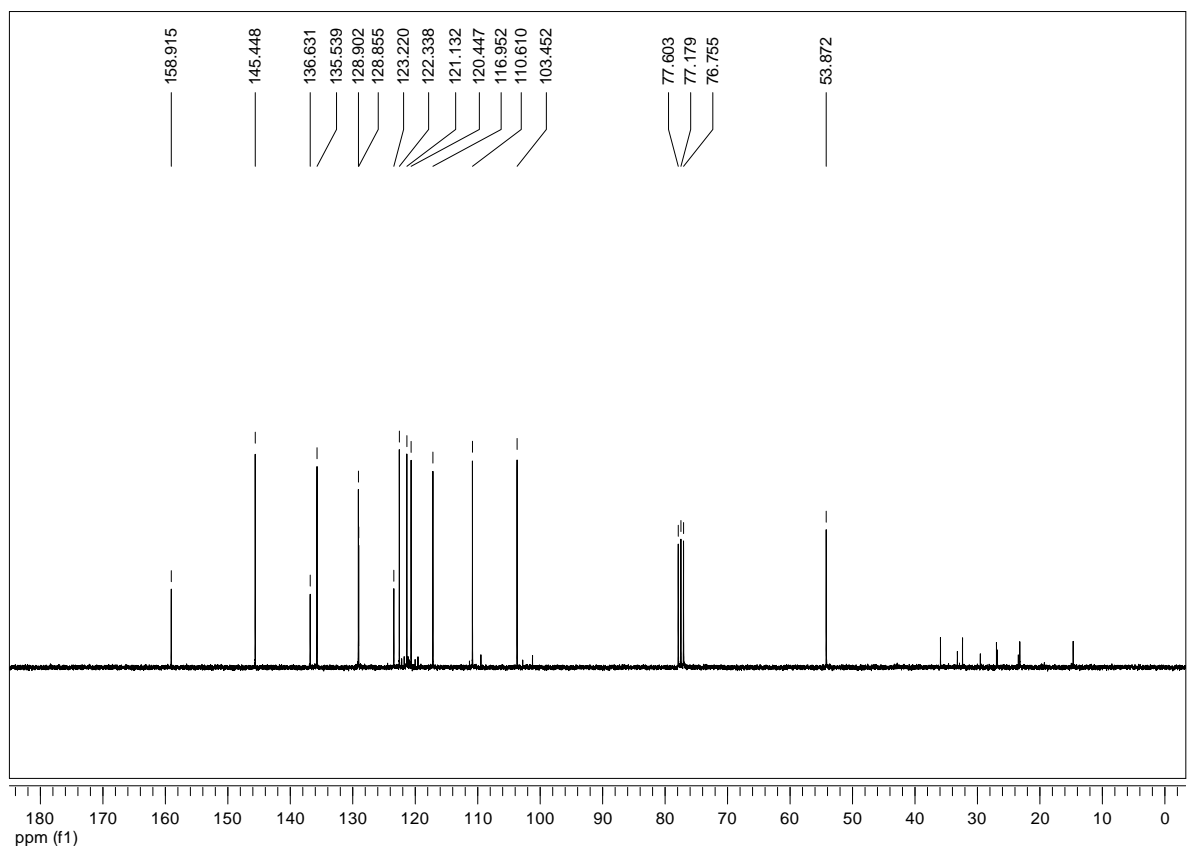

### 3-(1-Benzimidazolyl)-2-methoxypyridine (1d).

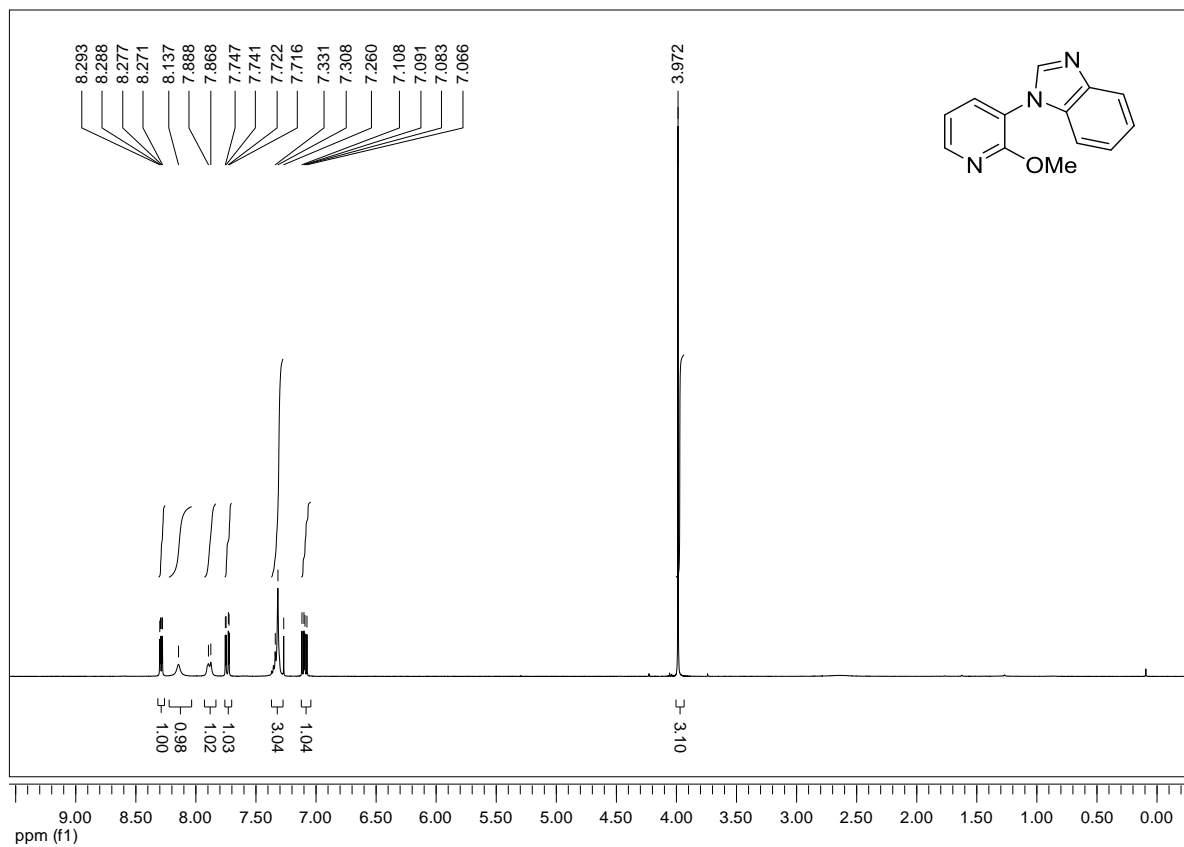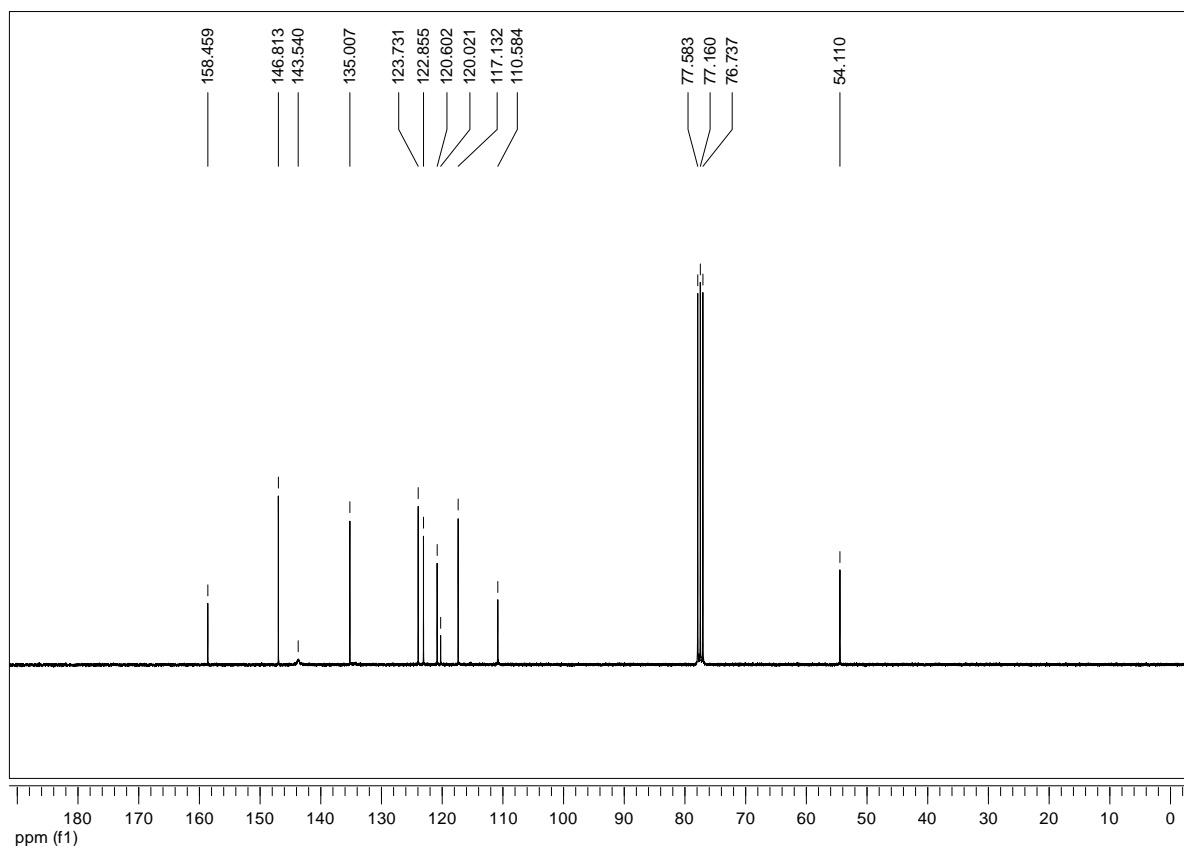

### 3-Methoxy-4-(1-pyrrolyl)pyridine (2b).

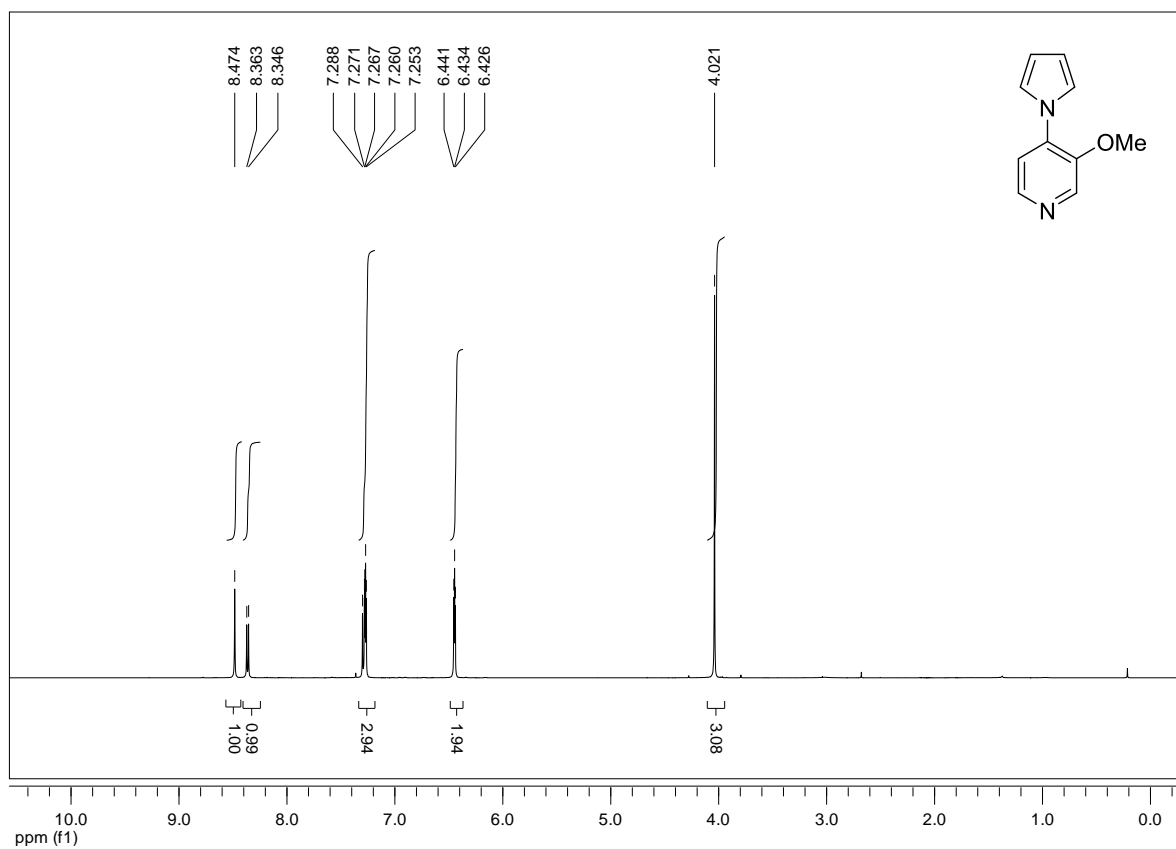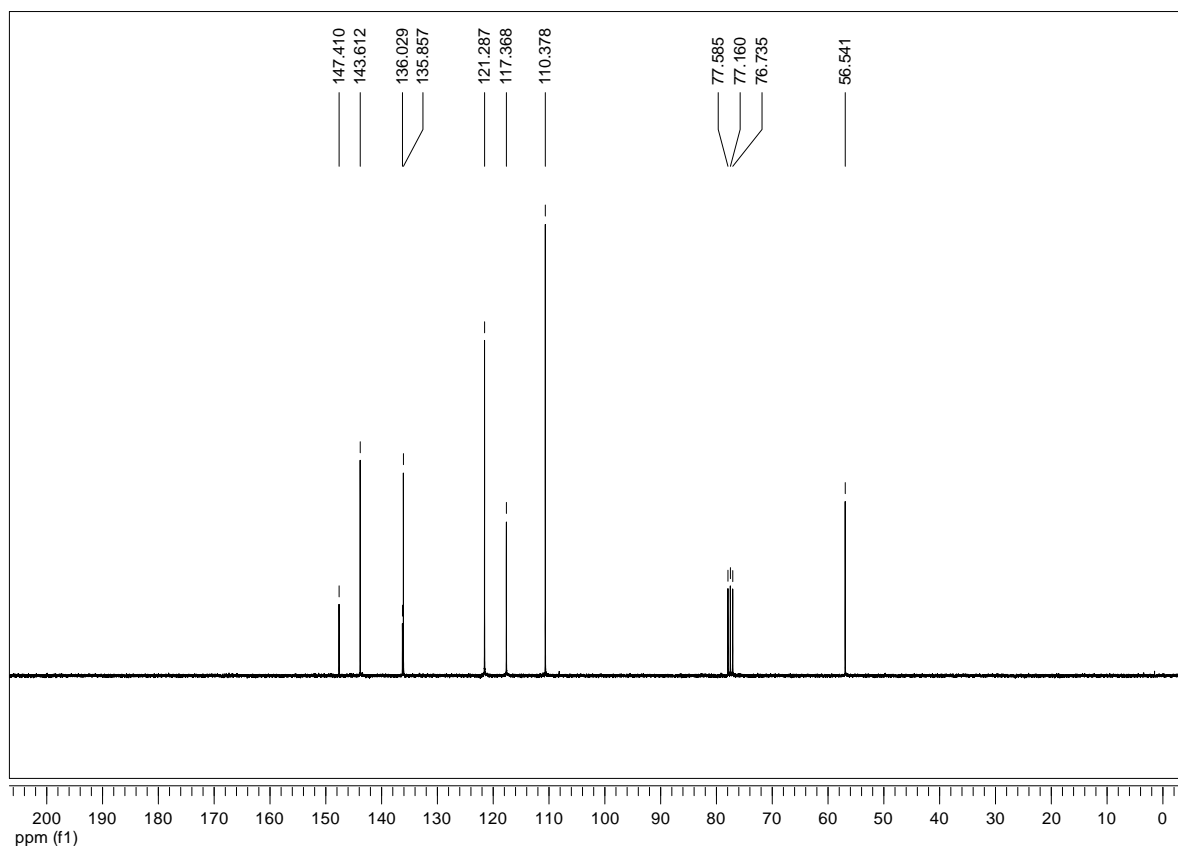

### 4-(1-Indolyl)-3-methoxypyridine (2e).

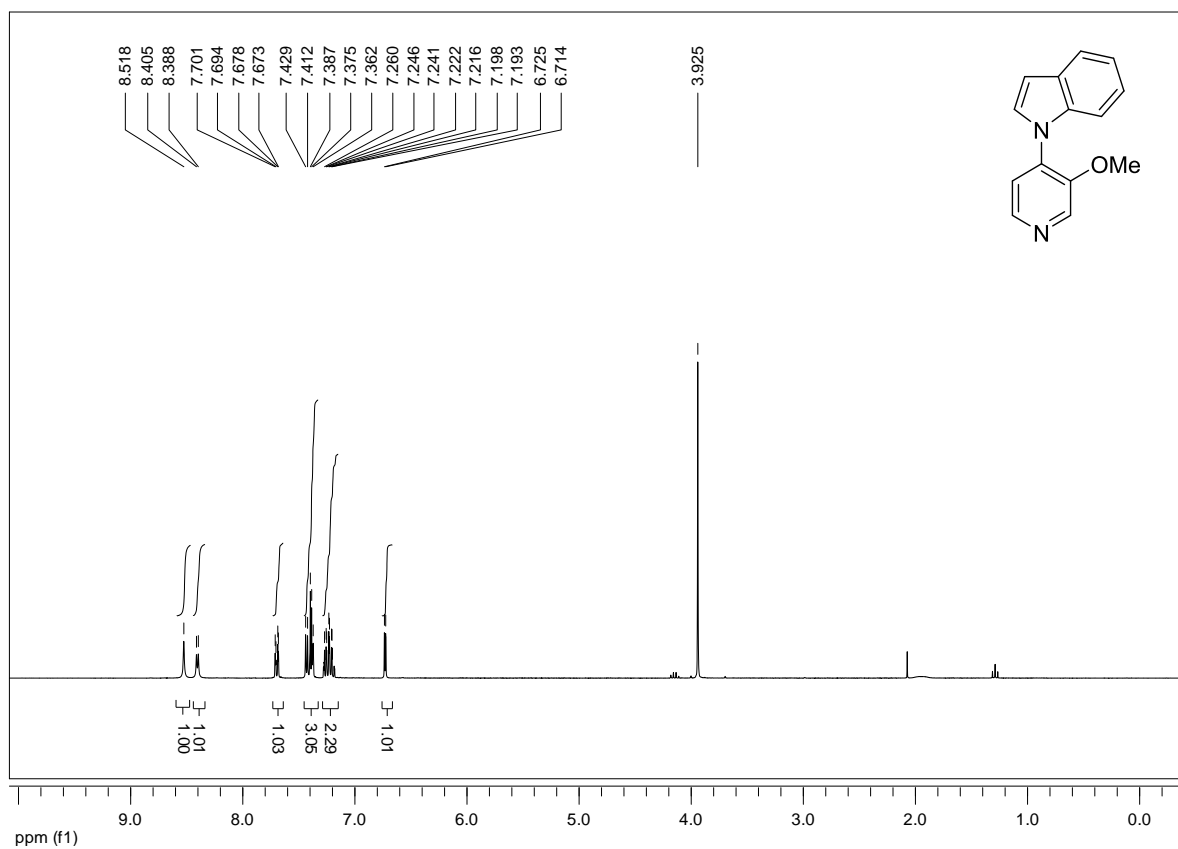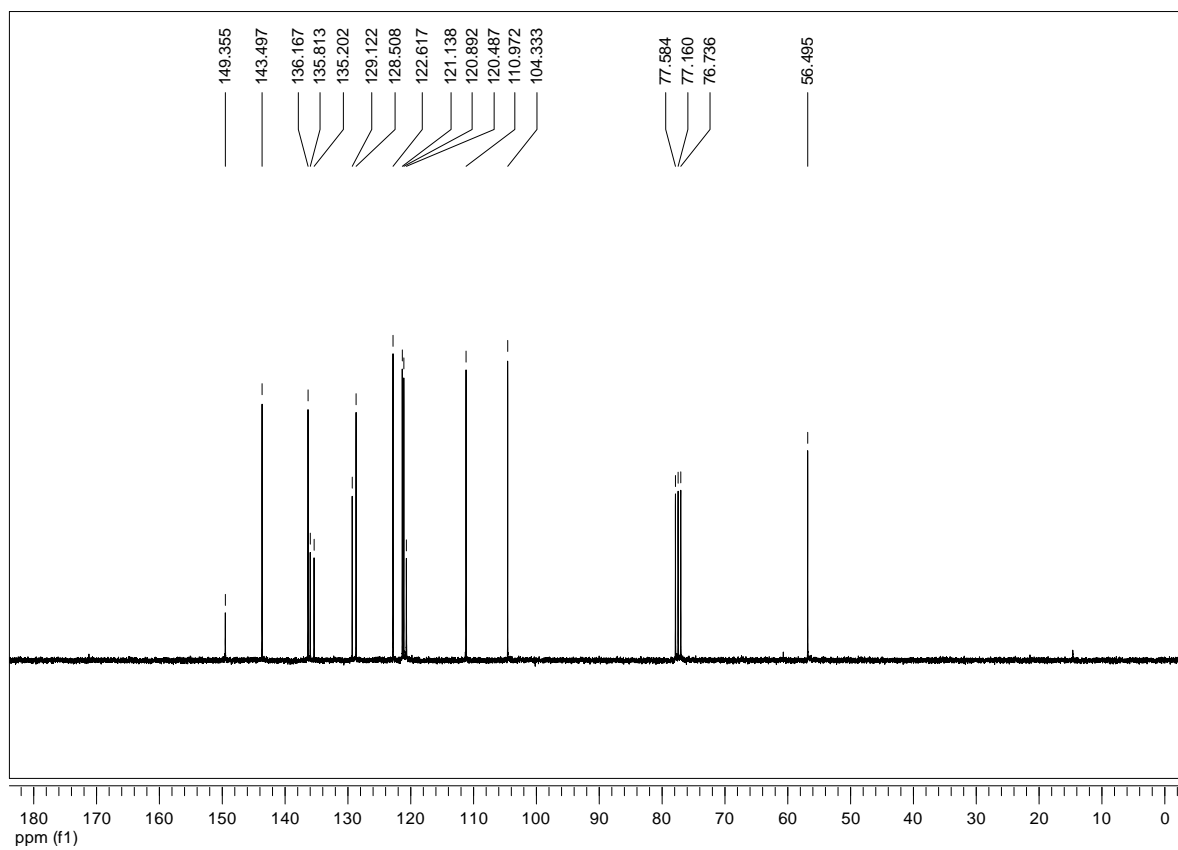

### 4-(1-Benzimidazolyl)-3-methoxypyridine (2d).

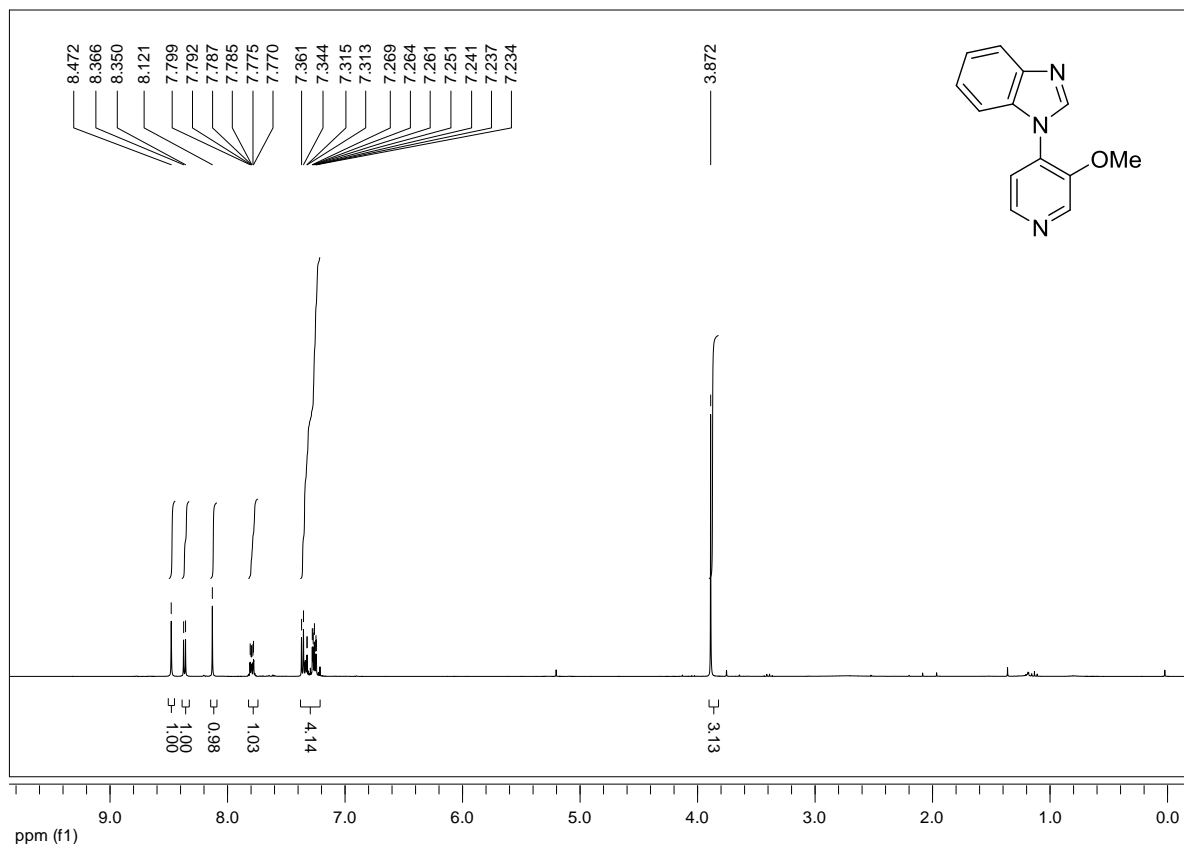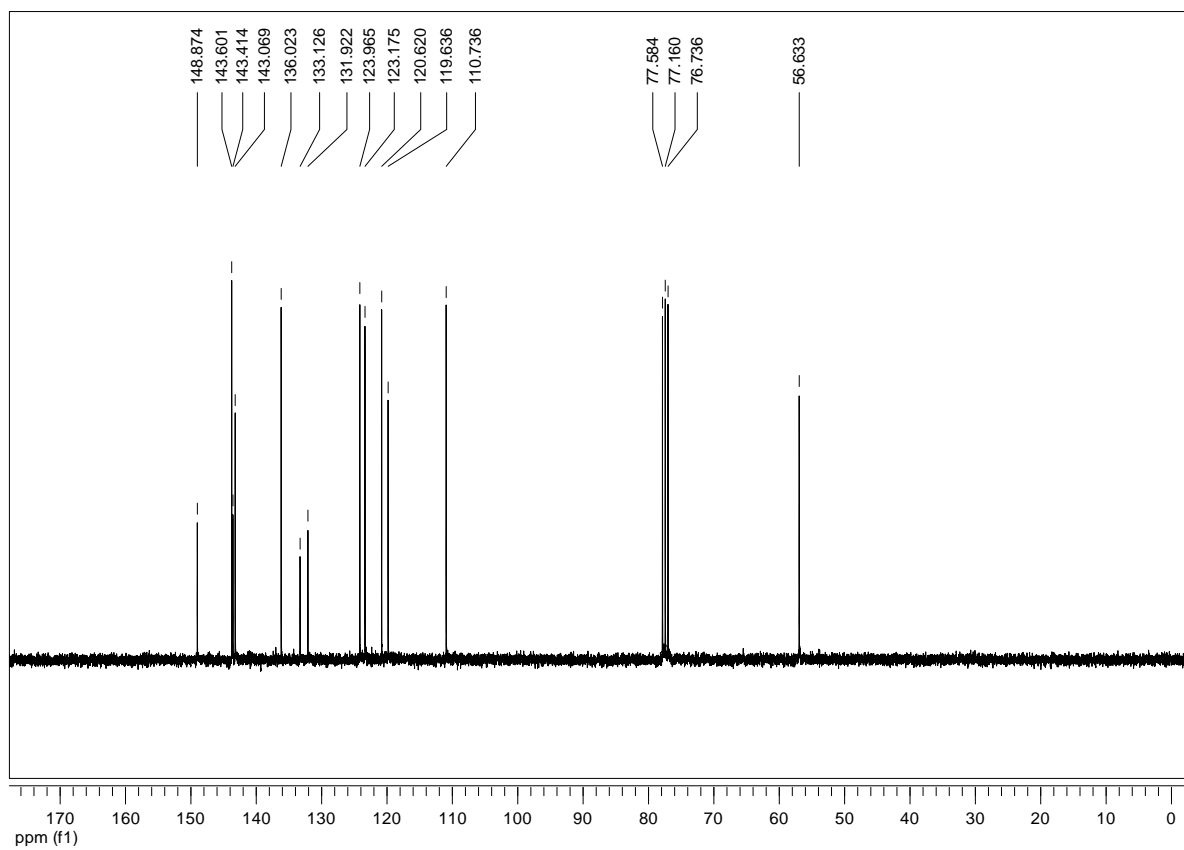



### 4-Methoxy-3-(1-pyrrolyl)pyridine (3b).

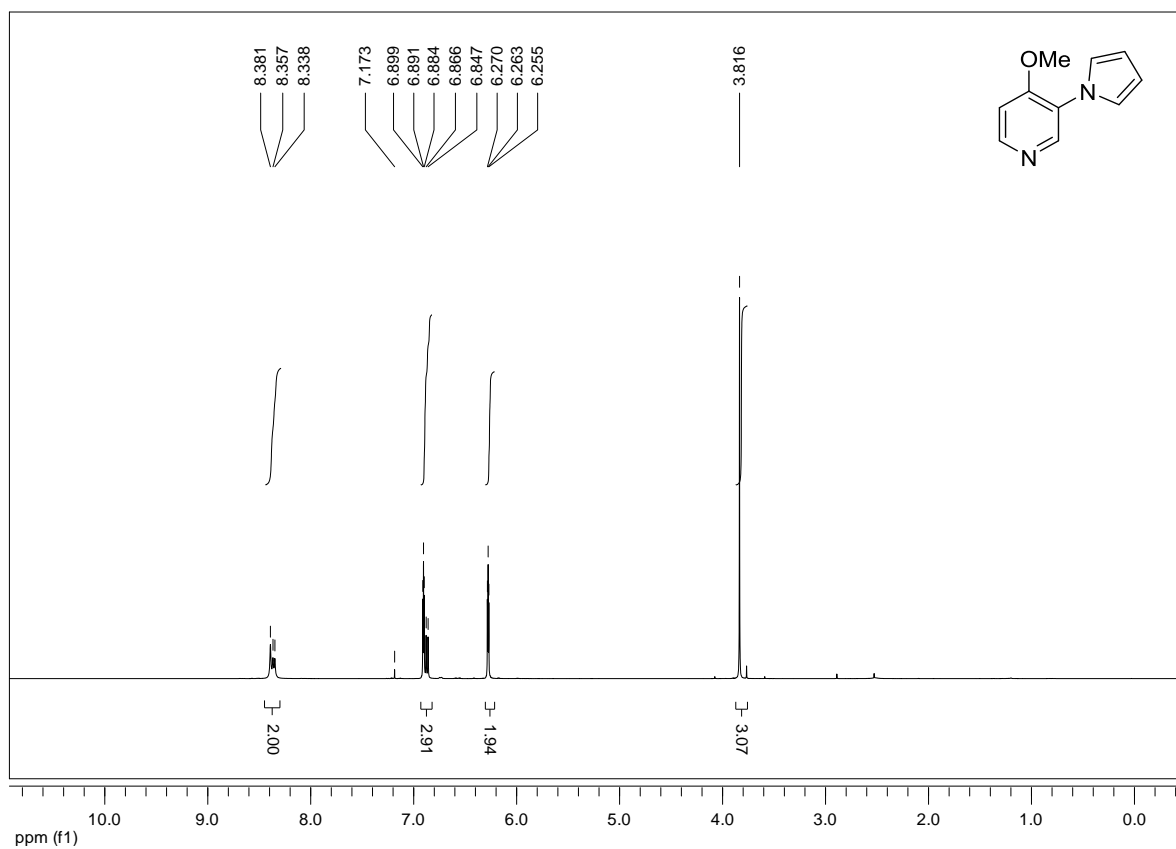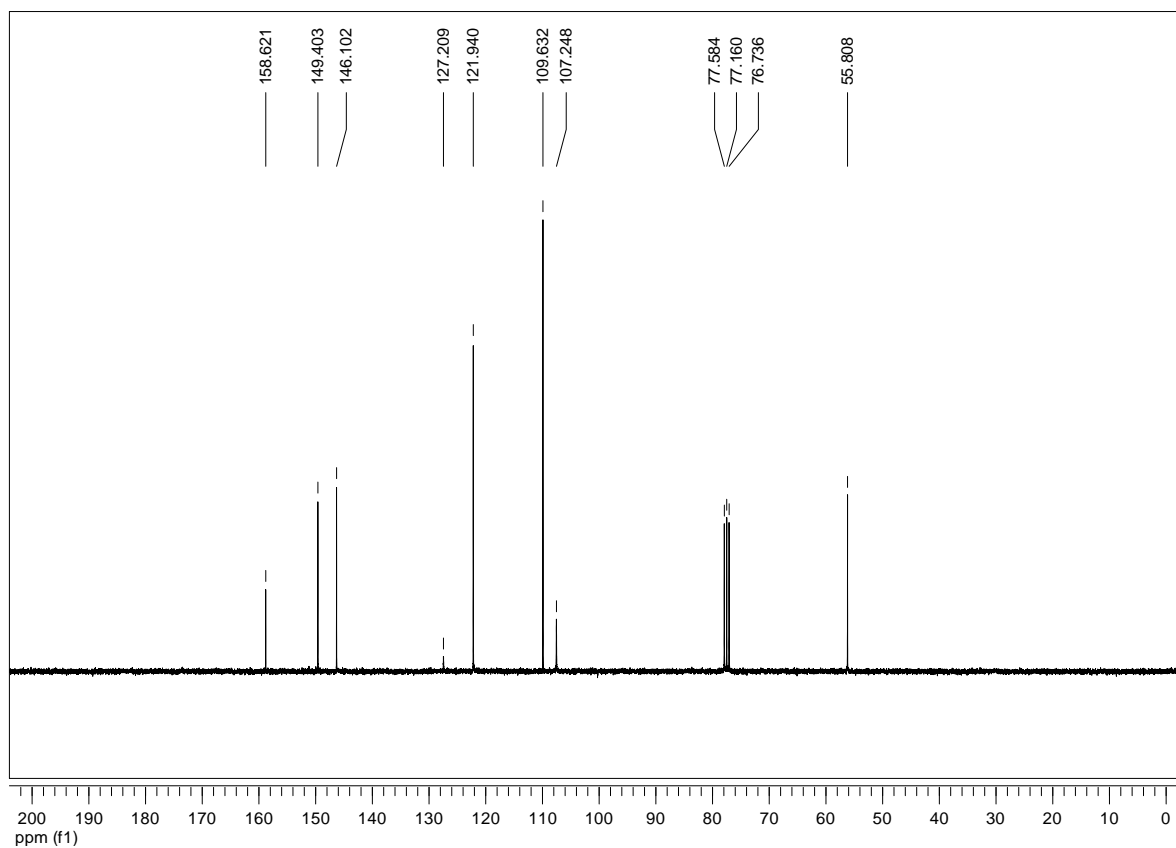

### 3,4-Bis(1-pyrryl)pyridine (3b<sup>''</sup>).

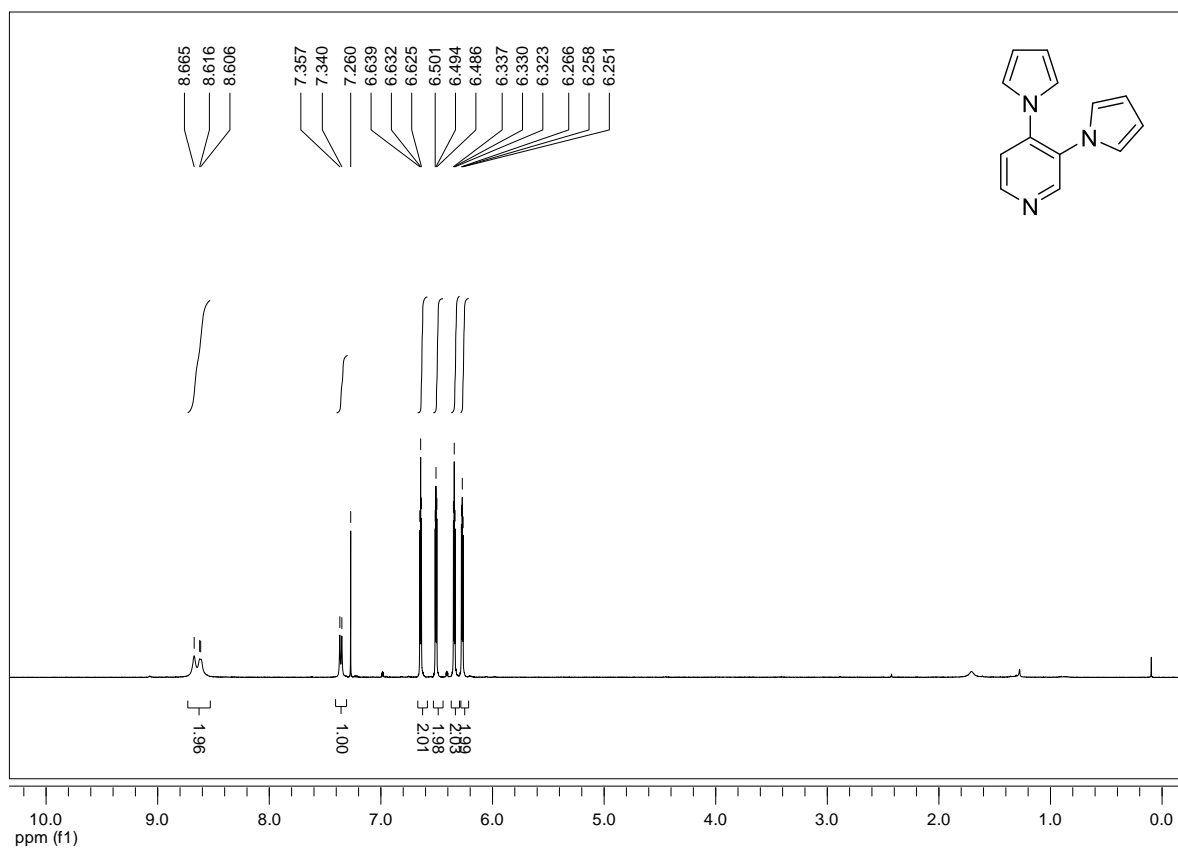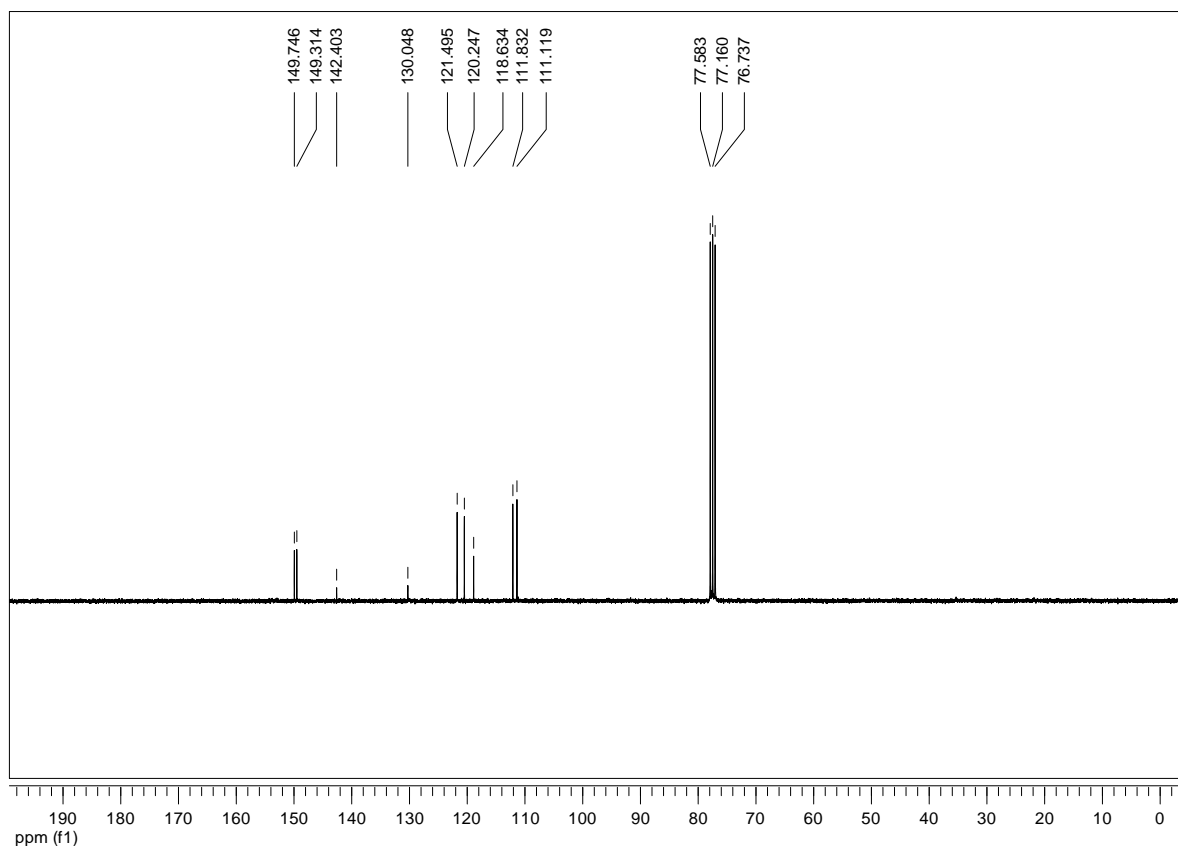

### 3-(1-Indolyl)-4-methoxypyridine (3e).

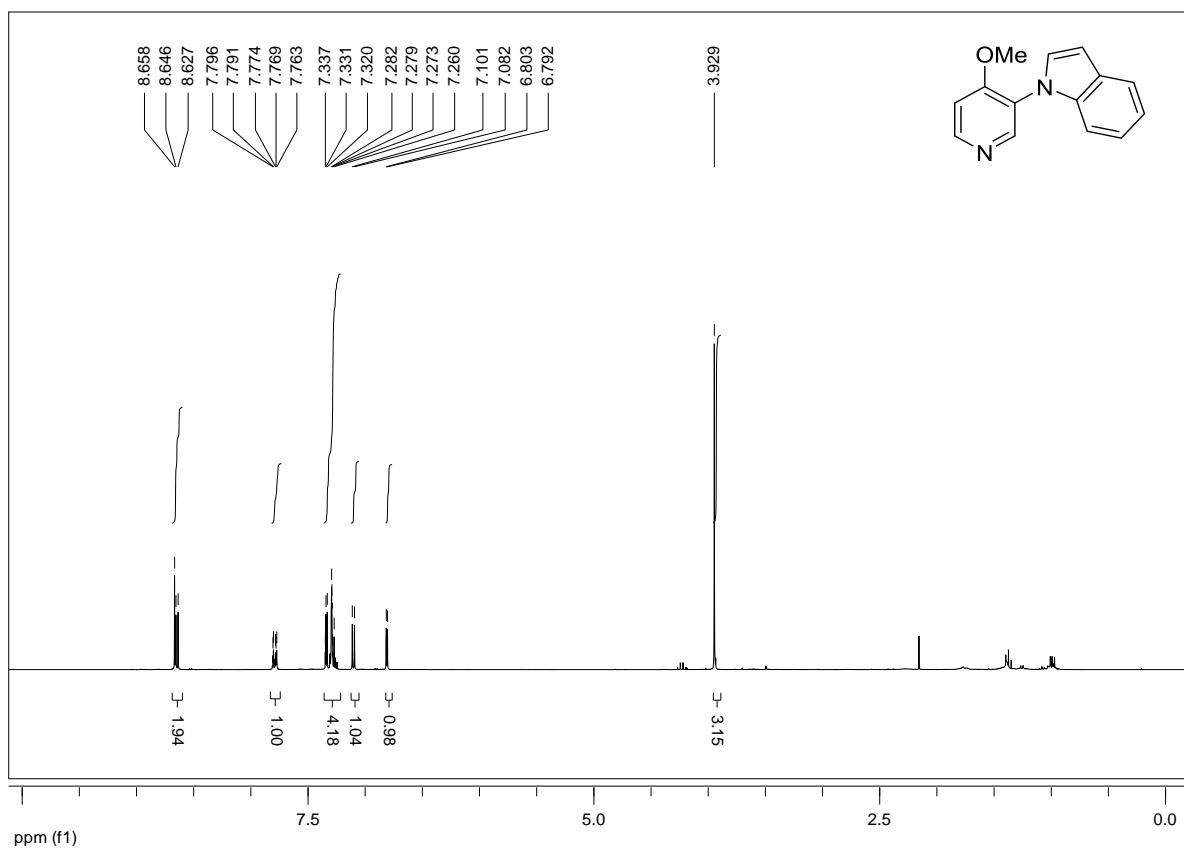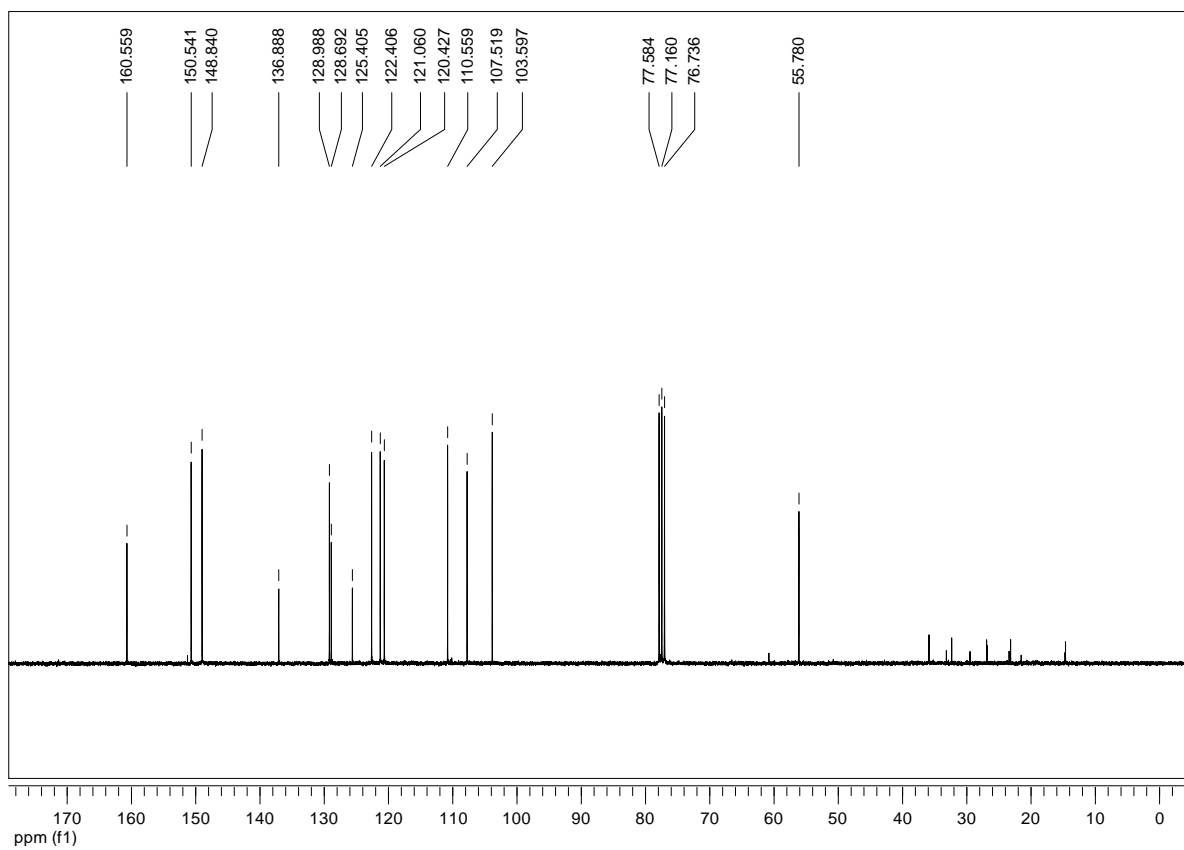

### 2,3-Dimethoxy-4-(1-pyrrolyl)pyridine (4b).

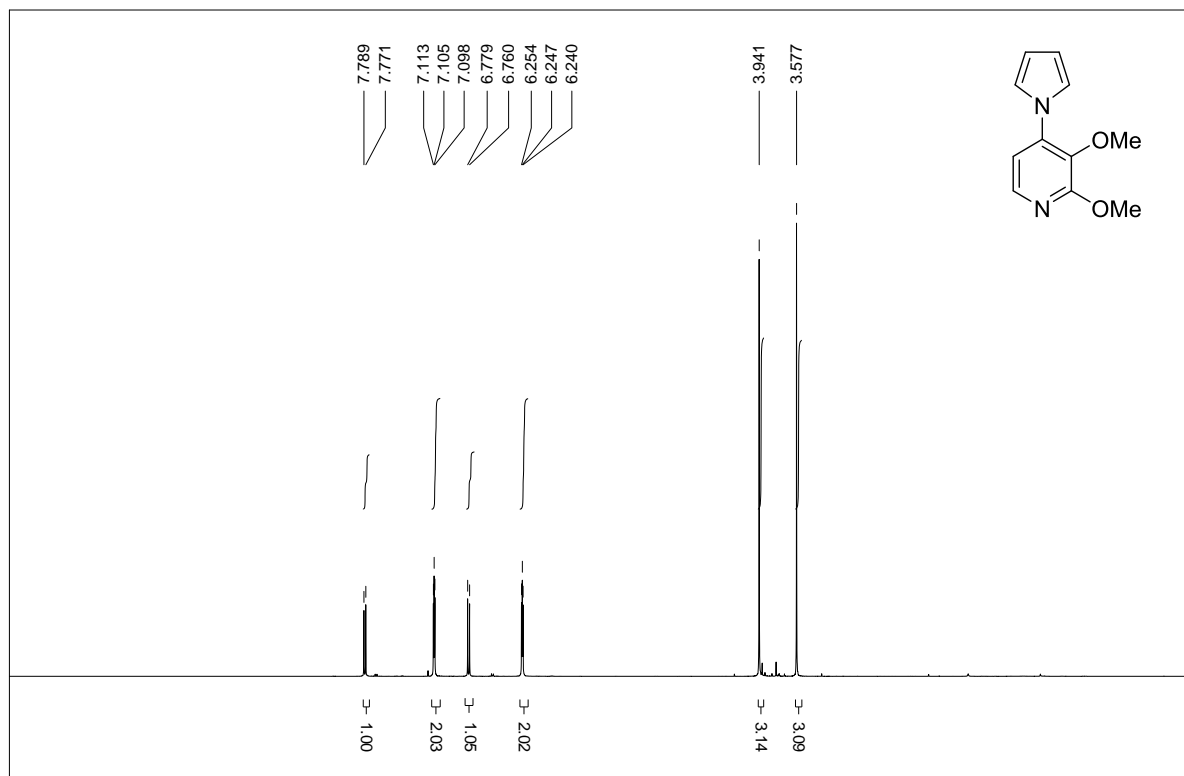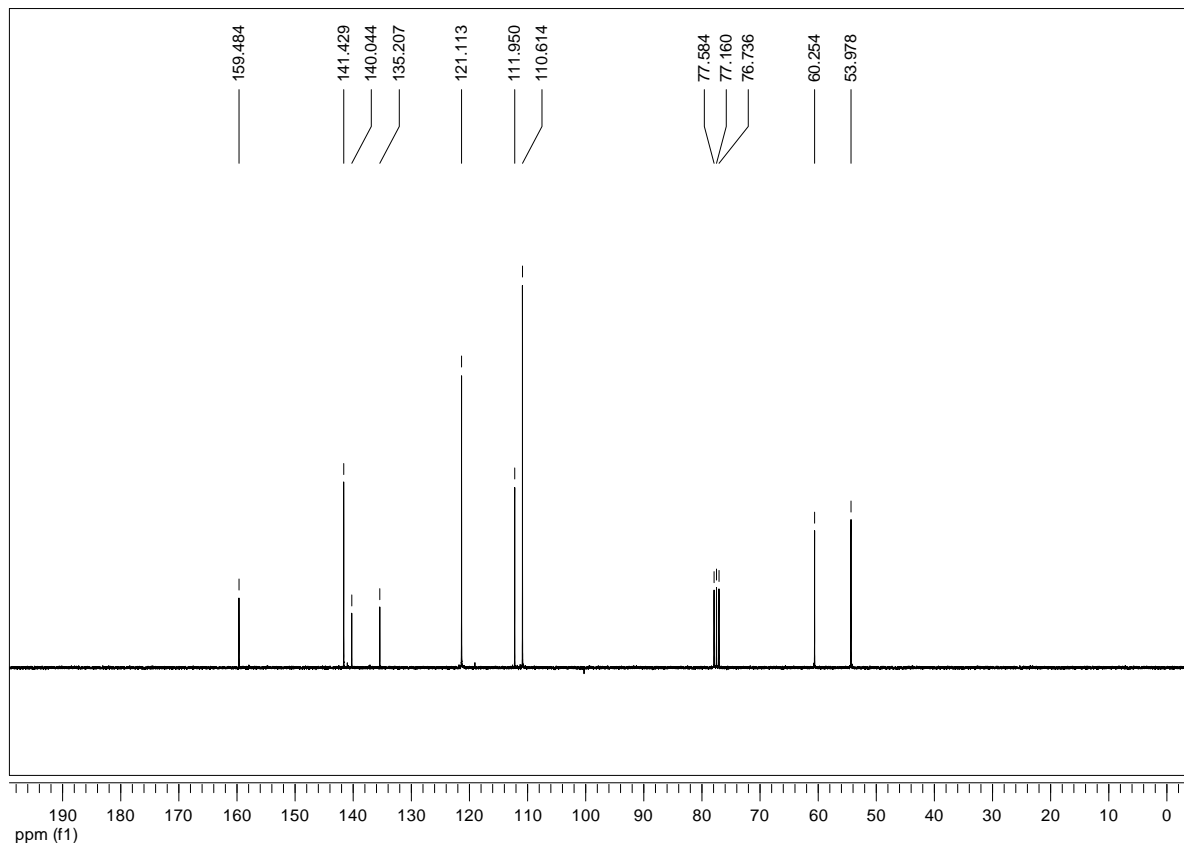

### 4-(1-Indolyl)-2,3-dimethoxypyridine (4e).

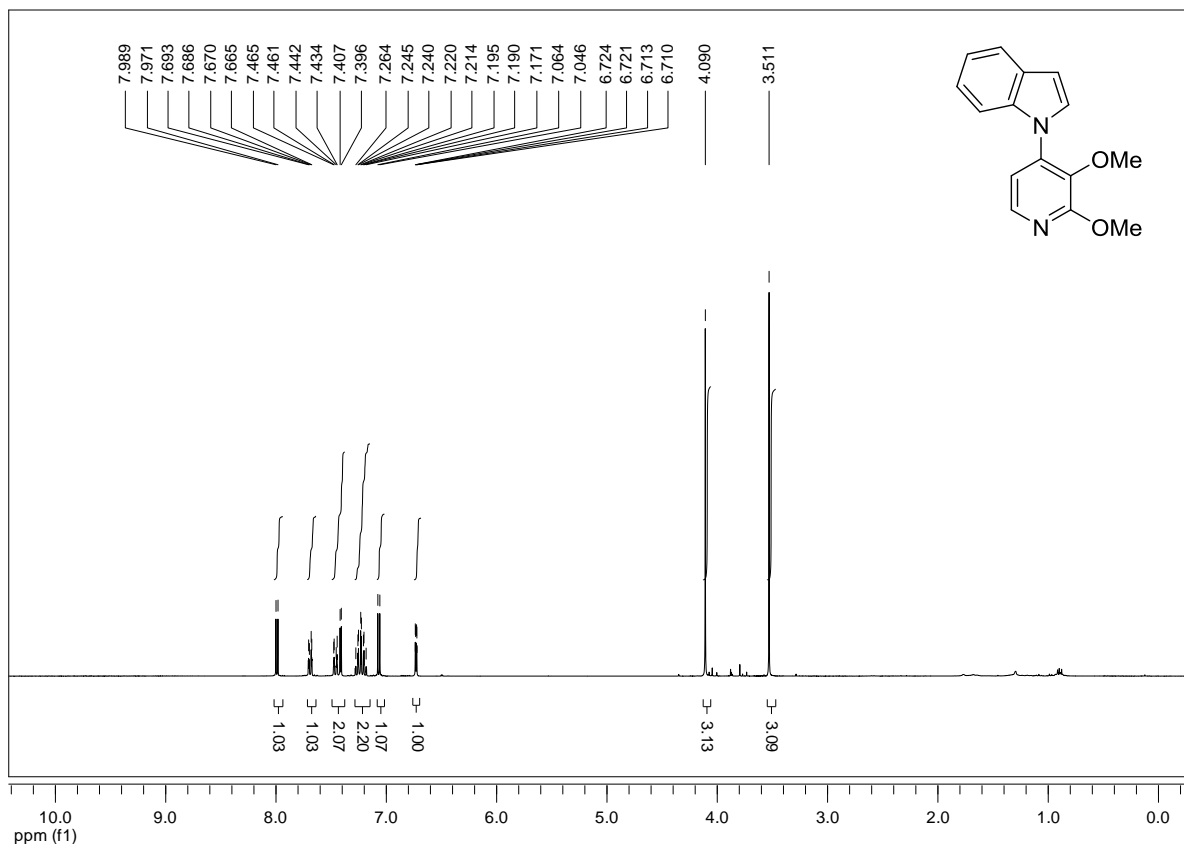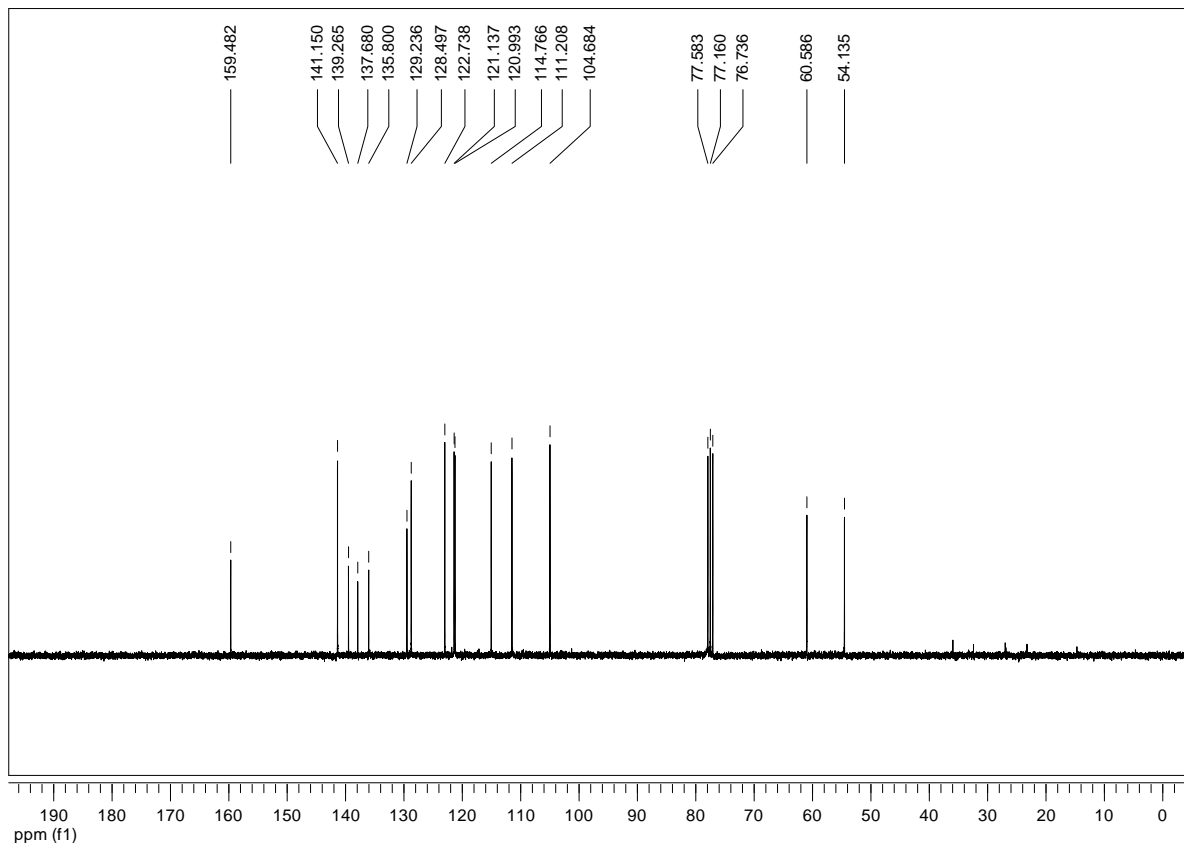

## 2,6-Dimethoxy-3-(1-pyrrolyl)pyridine (5b).

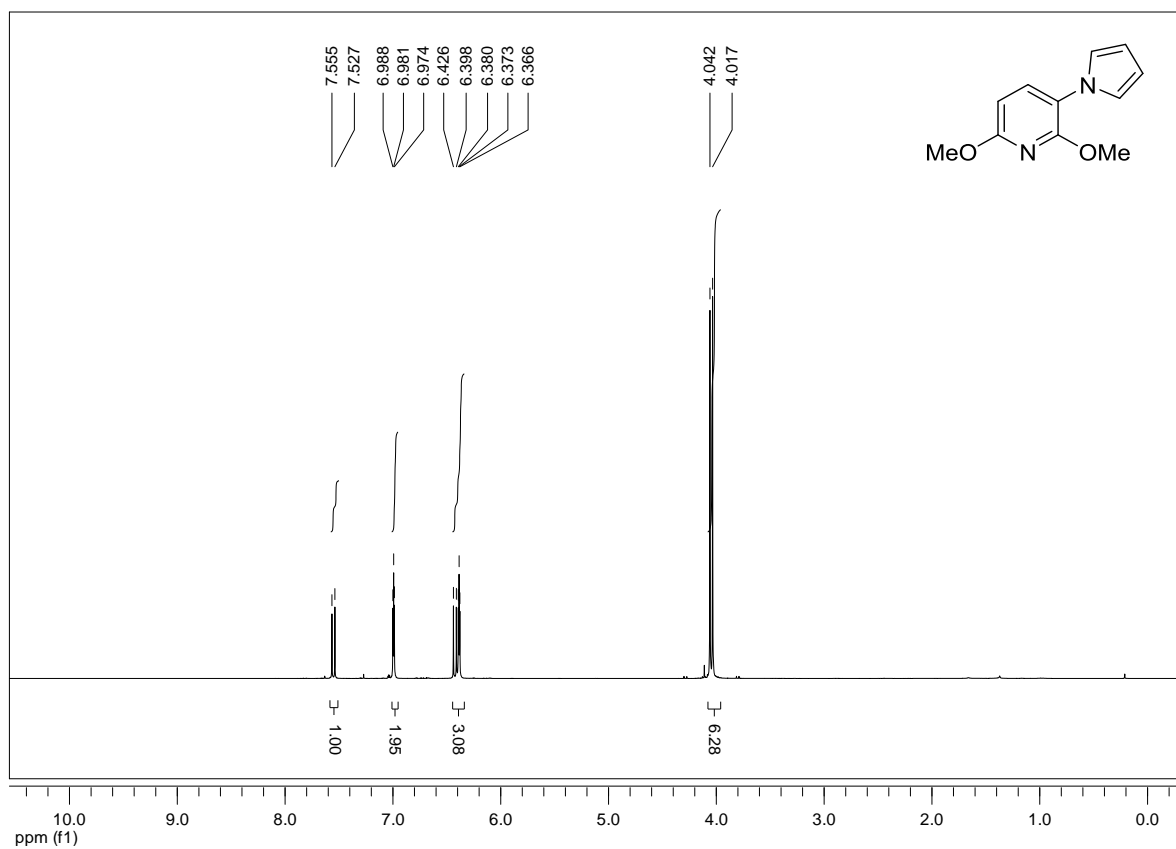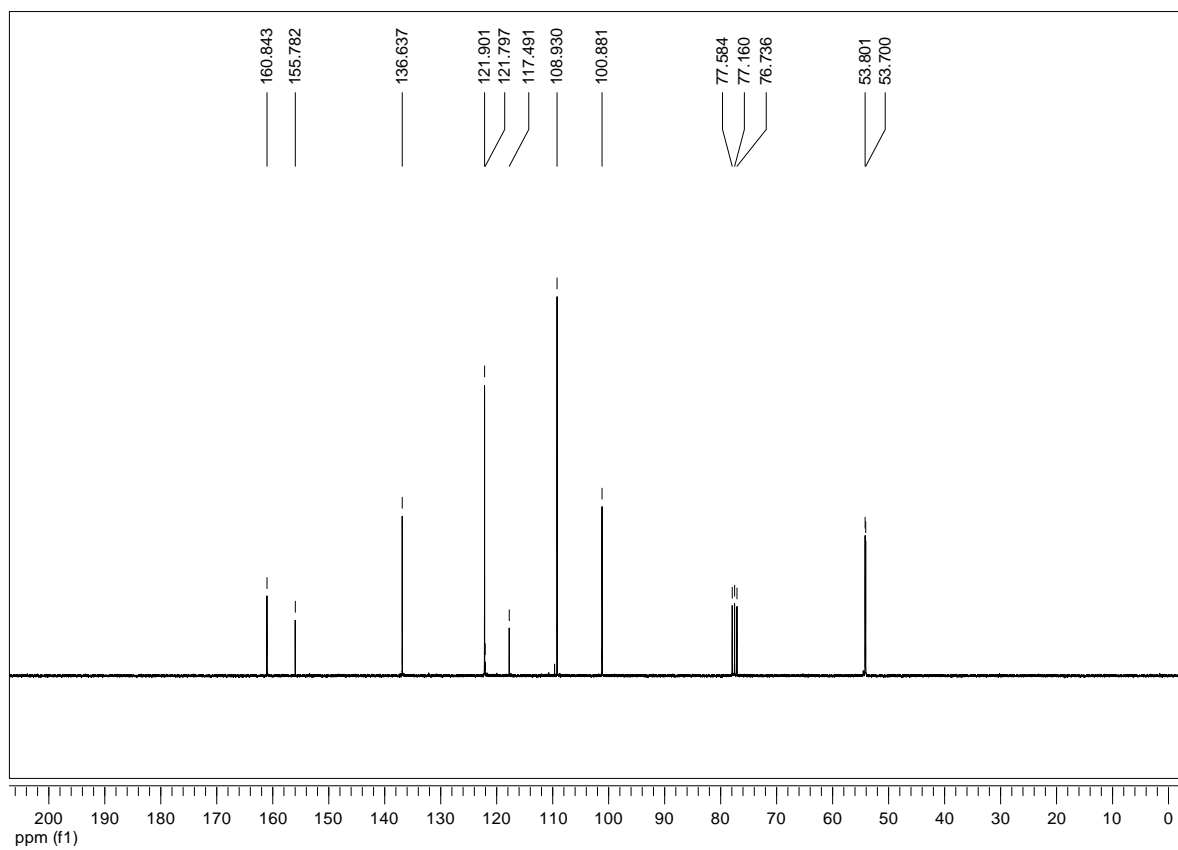

### 3-(1-Indolyl)-2,6-dimethoxypyridine (5e).

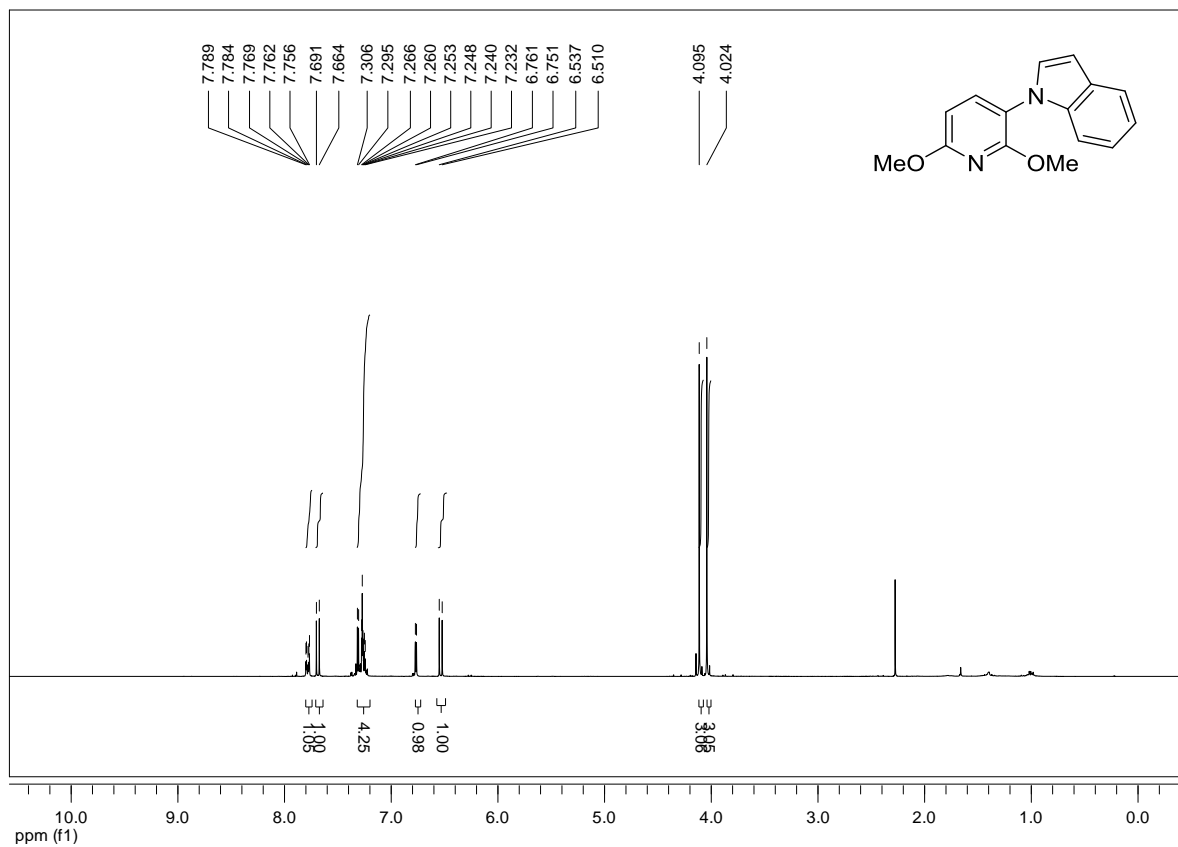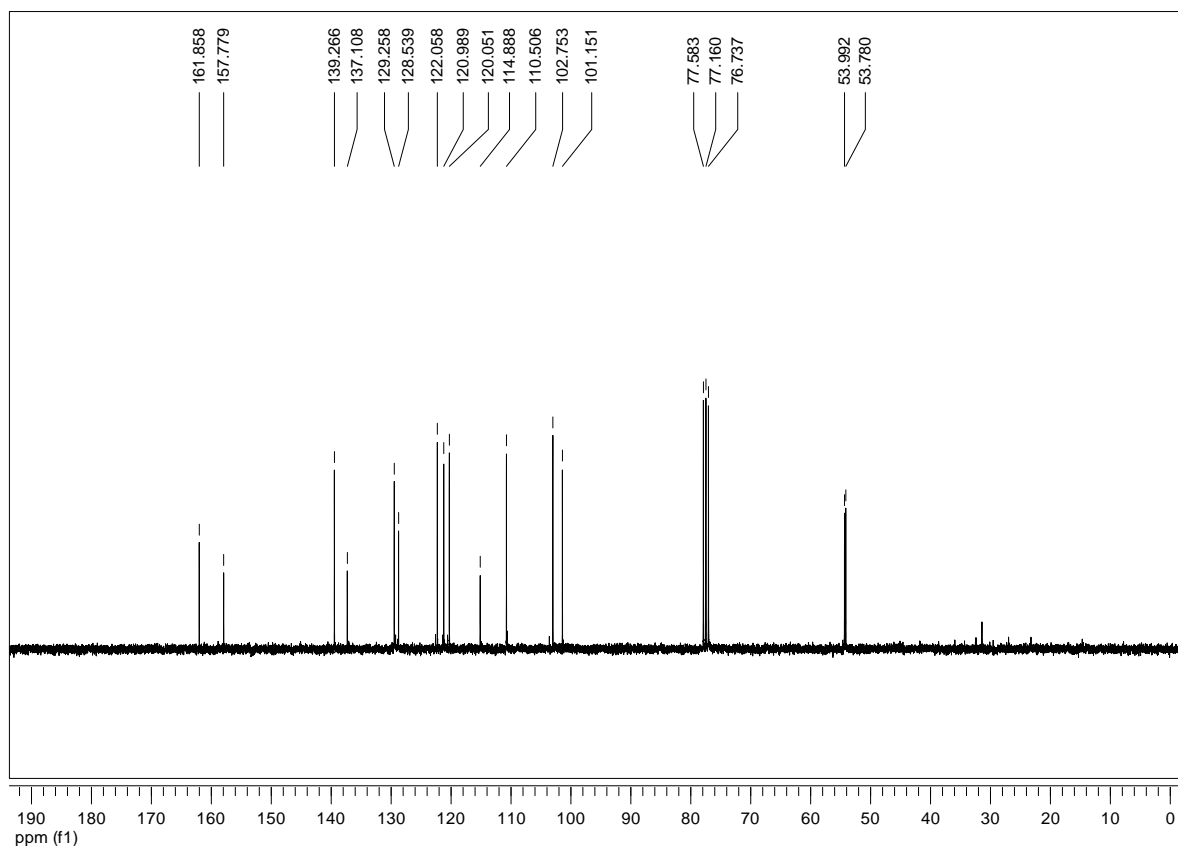

Supplement: mmc1 [file mmc1.pdf]
